# Supplementary material for: Discovery and Characterization of Multiple Classes of Human CatSper Blockers
Source: PubMed Central journal article supplement — ChemMedChem. 2022 Jun 14;17(15):e202000499. doi: 10.1002/cmdc.202000499 (PMC9378630; doi:10.1002/cmdc.202000499), 2022-06-14

## Table of Contents

|                                                                                                                                             |         |
|---------------------------------------------------------------------------------------------------------------------------------------------|---------|
| <b>Figure S1.</b> Representative $I_{CatSper}$ recordings from healthy human sperm in the absence and presence of test compound <b>3a</b> . | Page 2  |
| <b>Figure S2.</b> Representative $I_{CatSper}$ recordings from healthy human sperm in the absence and presence of test compound <b>4a</b> . | Page 2  |
| <b>Figure S3.</b> Representative $I_{CatSper}$ recordings from healthy human sperm in the absence and presence of test compound <b>5f</b> . | Page 3  |
| <b>Figure S4.</b> Representative $I_{CatSper}$ recordings from healthy human sperm in the absence and presence of test compound <b>6b</b> . | Page 3  |
| <b>Figure S5.</b> Representative $I_{CatSper}$ recordings from healthy human sperm in the absence and presence of test compound <b>7a</b> . | Page 4  |
| Table S1. Inhibition high potassium/high pH-activation of CatSper by compounds from each hit series                                         | Page 5  |
| Table S2. Reduction of $I_{CatSper}$ current density in human sperm by compounds from series <b>2</b> through <b>7</b> .                    | Page 6  |
| Purity data                                                                                                                                 | Page 7  |
| NMR spectra                                                                                                                                 | Page 22 |

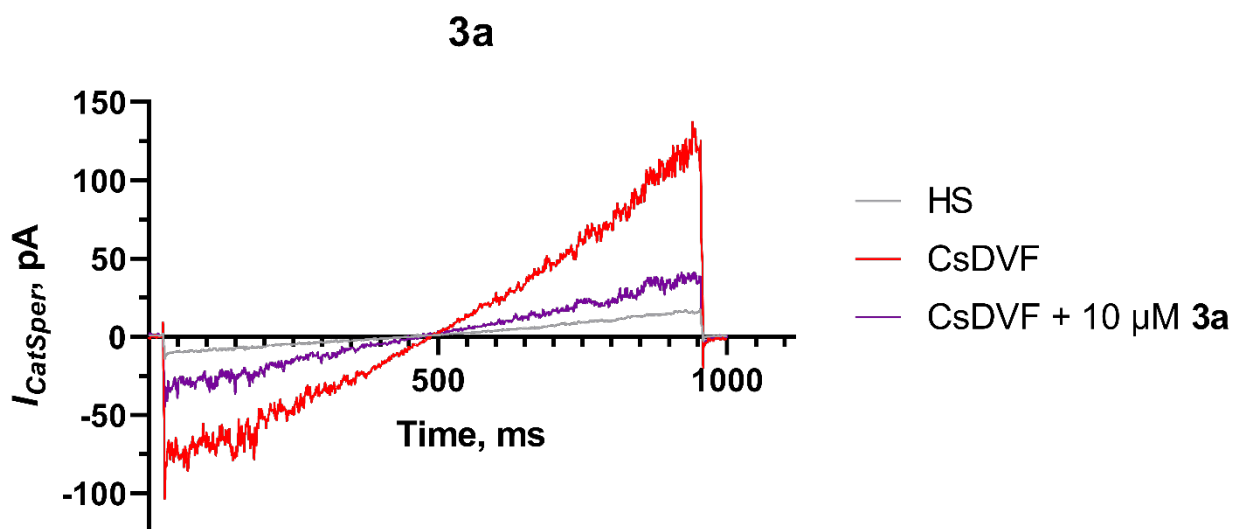

**Figure S1.** Representative  $I_{CatSper}$  recordings from healthy human sperm in the absence (red) and presence (purple) of test compound **3a**. Baseline signal in high saline (HS) buffer shown in grey.  $I_{CatSper}$  currents recorded in cesium divalent free media (CsDVF) elicited by the -80 mV (negative scale) or +80 mV (positive scale) voltage ramp.

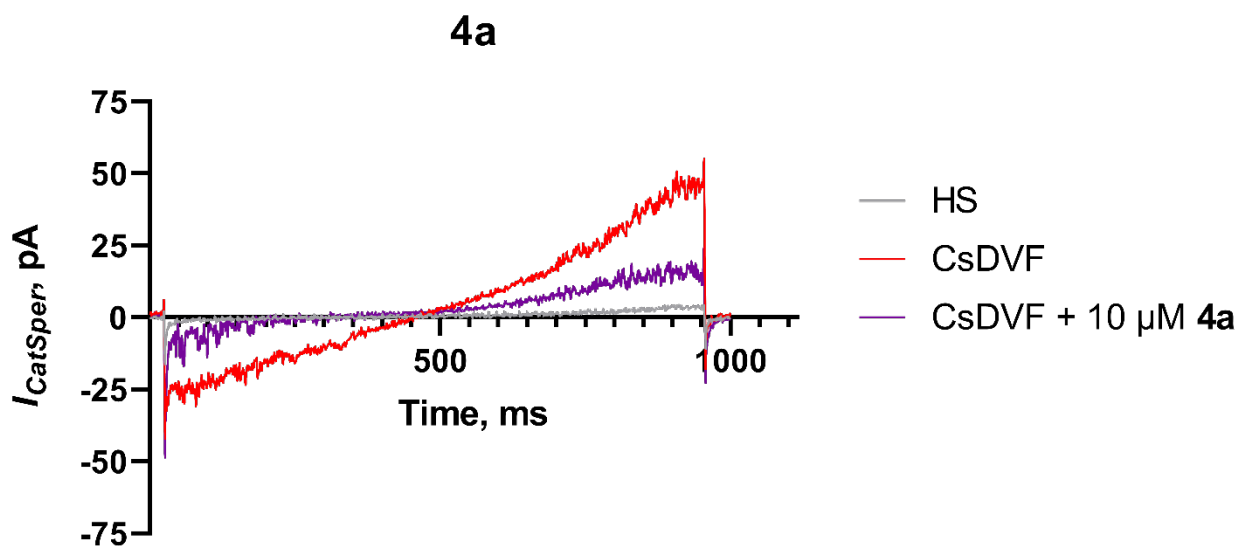

**Figure S2.** Representative  $I_{CatSper}$  recordings from healthy human sperm in the absence (red) and presence (purple) of test compound **4a**. Baseline signal in high saline (HS) buffer shown in grey.  $I_{CatSper}$  currents recorded in CsDVF elicited by the -80 mV (negative scale) or +80 mV (positive scale) voltage ramp.

**5f**

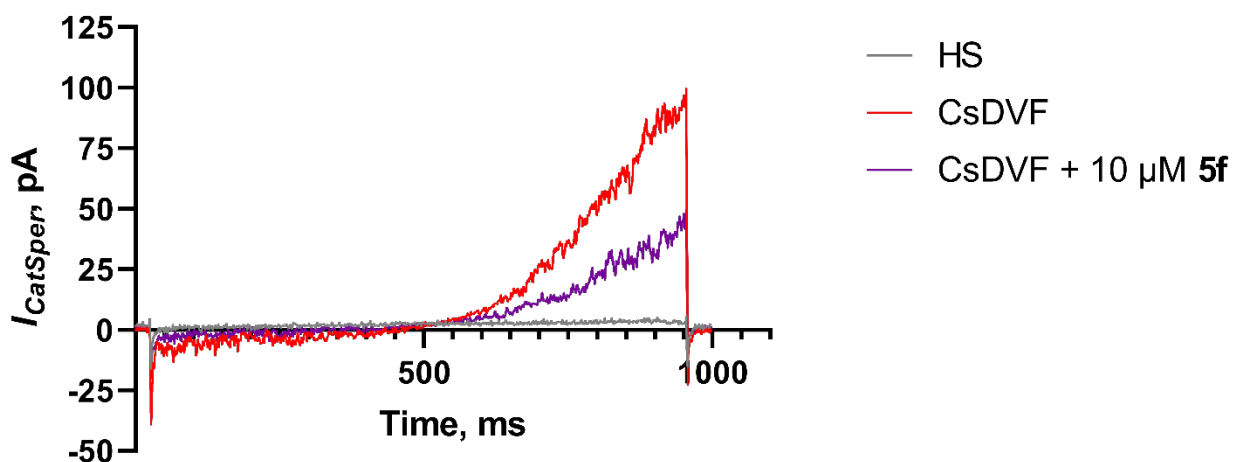

**Figure S3.** Representative  $I_{CatSper}$  recordings from healthy human sperm in the absence (red) and presence (purple) of test compound **5f**. Baseline signal in high HS buffer shown in grey.  $I_{CatSper}$  currents recorded in CsDVF elicited by the -80 mV (negative scale) or +80 mV (positive scale) voltage ramp.

**6b**

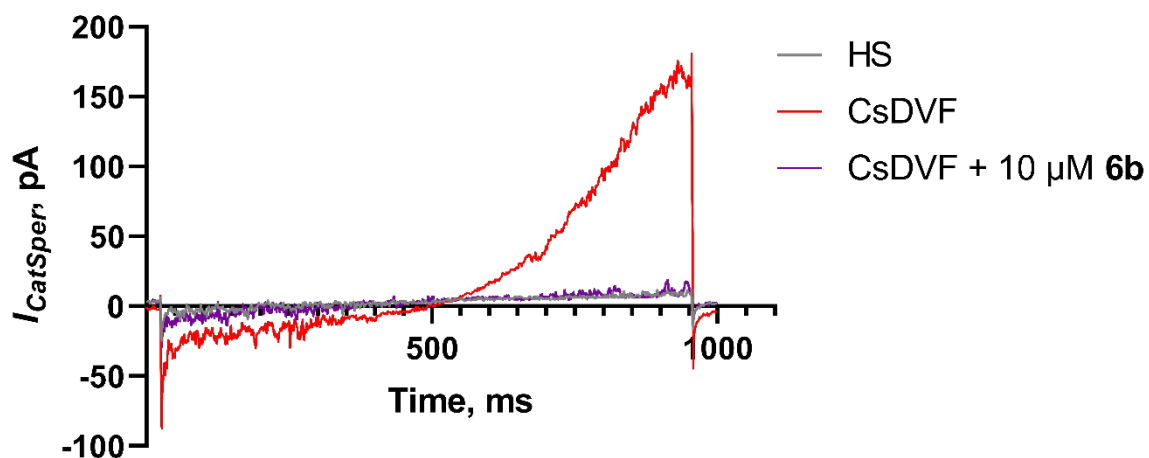

**Figure S4.** Representative  $I_{CatSper}$  recordings from healthy human sperm in the absence (red) and presence (purple) of test compound **6b**. Baseline signal in high saline (HS) buffer shown in grey.  $I_{CatSper}$  currents recorded in CsDVF elicited by the -80 mV (negative scale) or +80 mV (positive scale) voltage ramp.

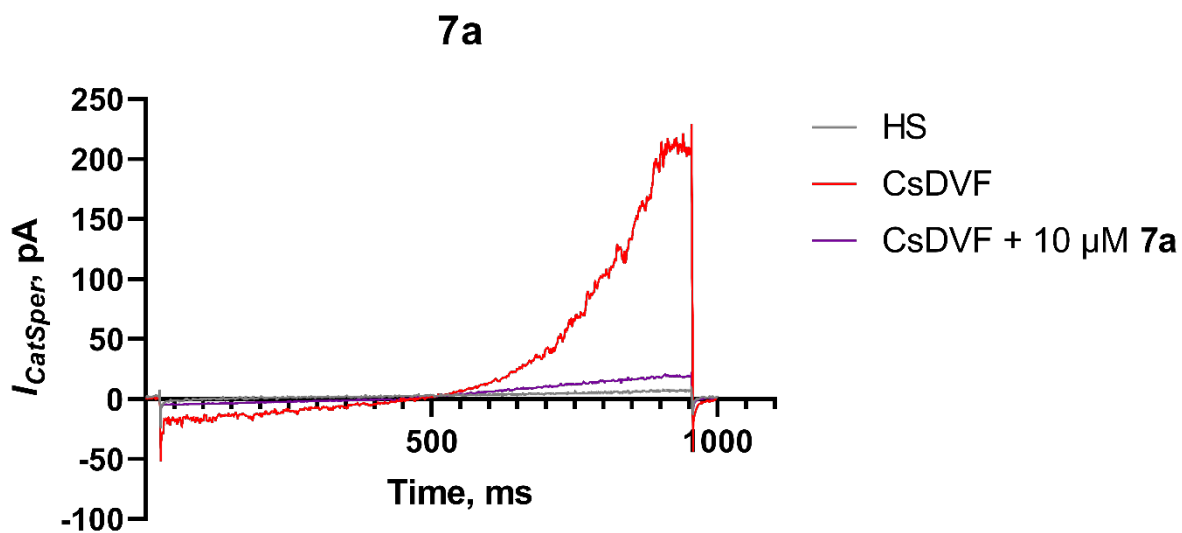

**Figure S5.** Representative  $I_{CatSper}$  recordings from healthy human sperm in the absence (red) and presence (purple) of test compound **7a**. Baseline signal in HS buffer shown in grey.  $I_{CatSper}$  currents recorded in CsDVF elicited by the -80 mV (negative scale) or +80 mV (positive scale) voltage ramp.

| Table S1. Inhibition of potassium-activation of CatSper by compounds from each hit series |           |                       |           |           |                       |
|-------------------------------------------------------------------------------------------|-----------|-----------------------|-----------|-----------|-----------------------|
| ID                                                                                        | Structure | IC <sub>50</sub> , μM | ID        | Structure | IC <sub>50</sub> , μM |
| <b>1a</b>                                                                                 |           | 9.6                   | <b>4b</b> |           | 6.9                   |
| <b>1b</b>                                                                                 |           | 12                    | <b>5a</b> |           | 6.3                   |
| <b>1c</b>                                                                                 |           | 59                    | <b>5d</b> |           | 33                    |
| <b>2a</b>                                                                                 |           | 12                    | <b>5k</b> |           | 18                    |
| <b>2d</b>                                                                                 |           | 12                    | <b>6b</b> |           | 5.1                   |
| <b>3a</b>                                                                                 |           | 7.8                   | <b>7a</b> |           | 11                    |
| <b>4a</b>                                                                                 |           | 9.2                   |           |           |                       |

CatSper activated by high potassium/high pH buffer. IC<sub>50</sub> values calculated from single experiments.

| Table S2. Reduction of $I_{CatSper}$ current density in human sperm by compounds from series <b>2</b> through <b>7</b> . |                         |                  |
|--------------------------------------------------------------------------------------------------------------------------|-------------------------|------------------|
| Compound                                                                                                                 | Current Density (pA/pF) |                  |
|                                                                                                                          | Inward (-80 mV)         | Outward (+80 mV) |
| CsDVF                                                                                                                    | -20 ± 3                 | 86 ± 12          |
| <b>2a</b>                                                                                                                | -5.0 ± 0.5              | 23 ± 4           |
| <b>3a</b>                                                                                                                | -4.0 ± 0.3              | 3.3 ± 2.9        |
| <b>4a</b>                                                                                                                | -3.4 ± 0.2              | 15 ± 2.4         |
| <b>5f</b>                                                                                                                | -15 ± 3                 | 35 ± 4           |
| <b>6b</b>                                                                                                                | -2.5 ± 1.1              | 0.1 ± 1.4        |
| <b>7a</b>                                                                                                                | -1.2 ± 0.4              | 5.9 ± 1.4        |

CsDVF = Cesium divalent free media. Values are the mean ± SEM of at least 3 independent experiments.

# Mass Analysis Report

## SAMPLE INFORMATION

Sample Name: 1a  
Acq Method Set: Col2\_50to500\_PosOnly

Acquired: 1/28/2022 8:12:07 PM CST  
InjVol: 3.00 uL

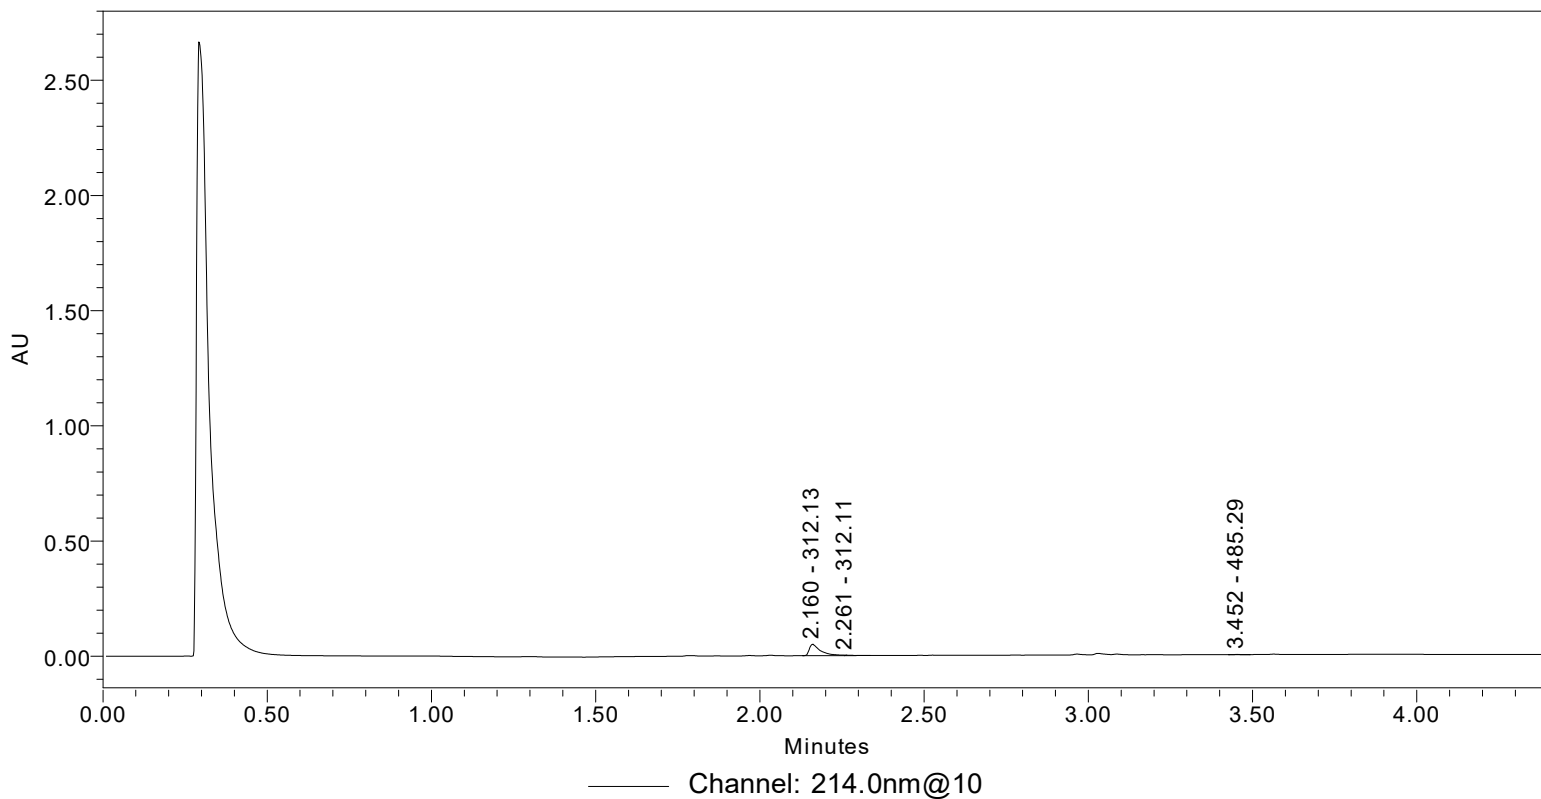

|   | RT    | Area   | % Area | Height | Base Peak (m/z) |
|---|-------|--------|--------|--------|-----------------|
| 1 | 2.160 | 116430 | 96.48  | 48975  | 312.13          |
| 2 | 2.261 | 3612   | 2.99   | 1843   | 312.11          |
| 3 | 3.452 | 636    | 0.53   | 389    | 485.29          |

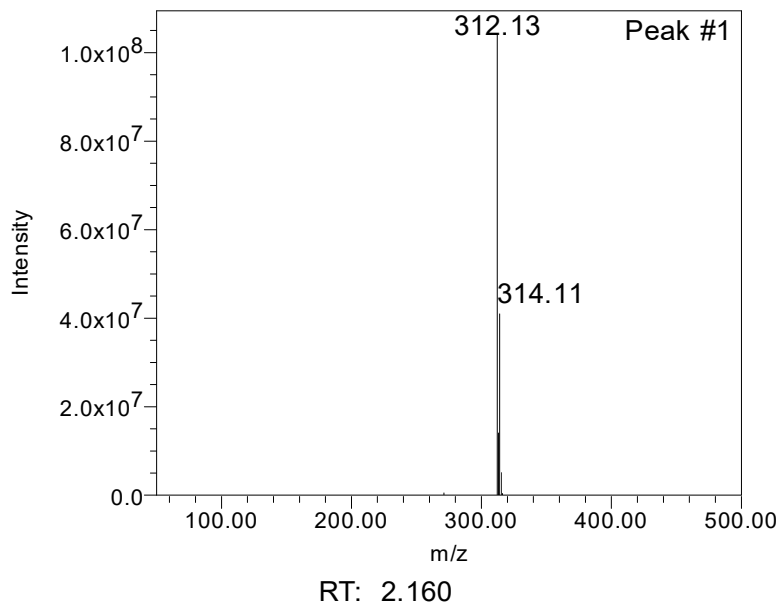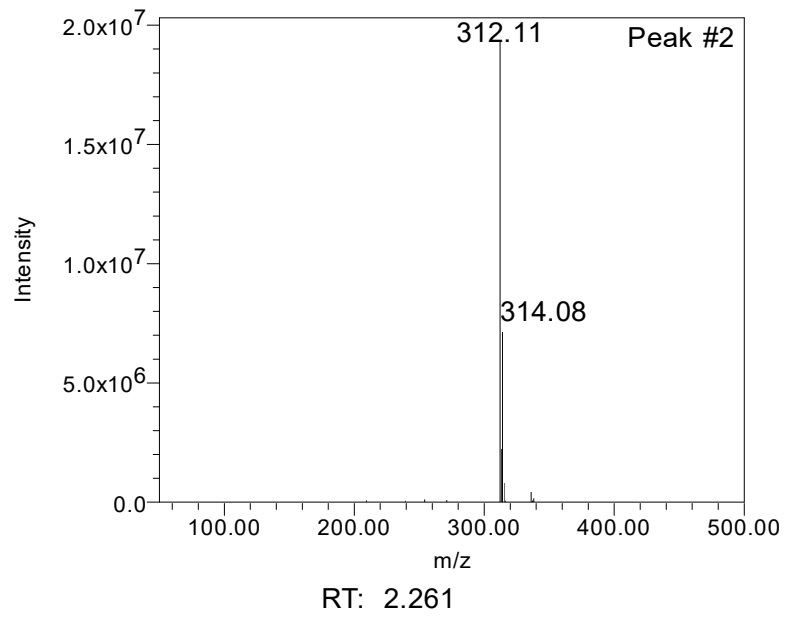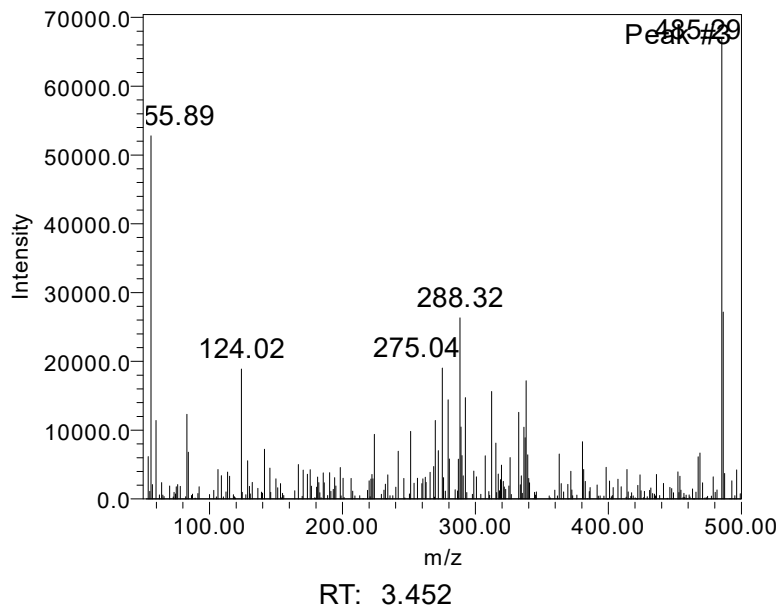



# Mass Analysis Report

## SAMPLE INFORMATION

Sample Name: 2a  
Acq Method Set: Col2\_50to500\_PosOnly

Acquired: 1/28/2022 8:19:07 PM CST  
InjVol: 3.00 uL

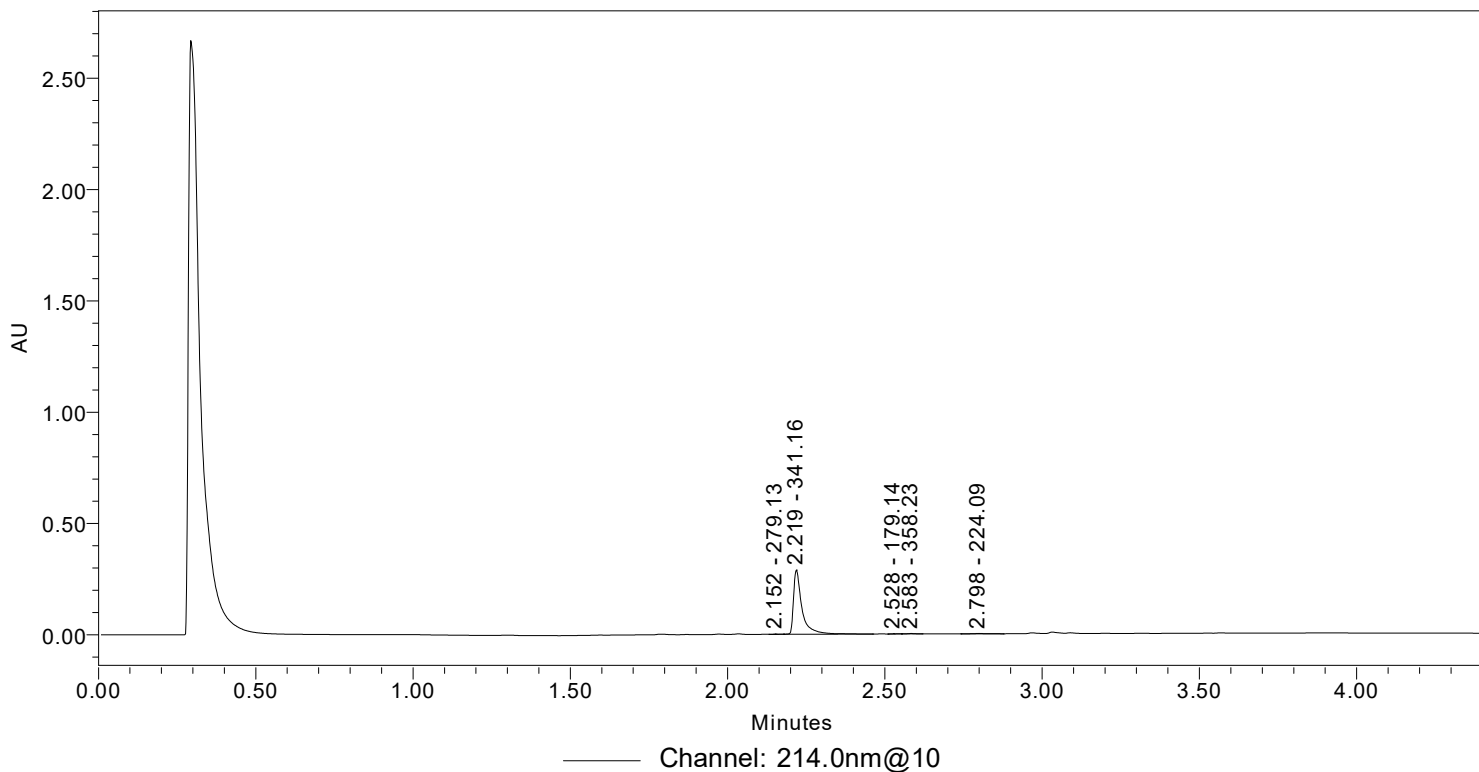

|   | RT    | Area   | % Area | Height | Base Peak (m/z) |
|---|-------|--------|--------|--------|-----------------|
| 1 | 2.152 | 2054   | 0.37   | 1309   | 279.13          |
| 2 | 2.219 | 541358 | 98.20  | 288613 | 341.16          |
| 3 | 2.528 | 1156   | 0.21   | 944    | 179.14          |
| 4 | 2.583 | 2494   | 0.45   | 1661   | 358.23          |
| 5 | 2.798 | 4191   | 0.76   | 1555   | 224.09          |

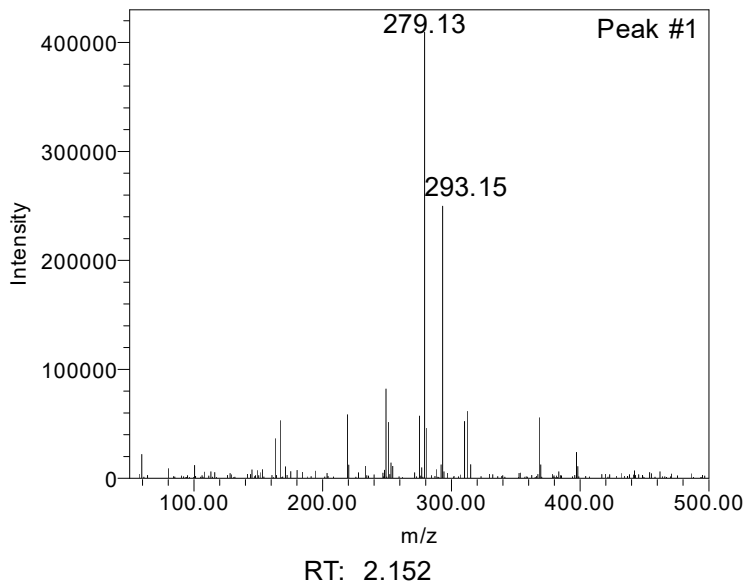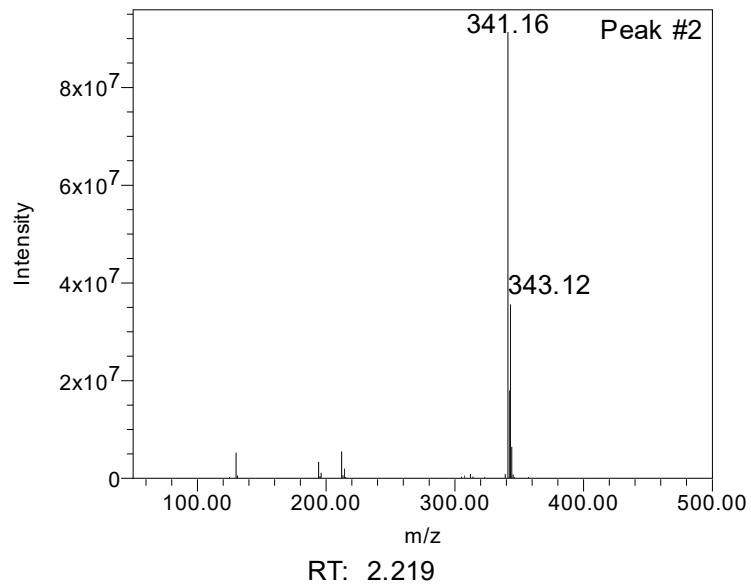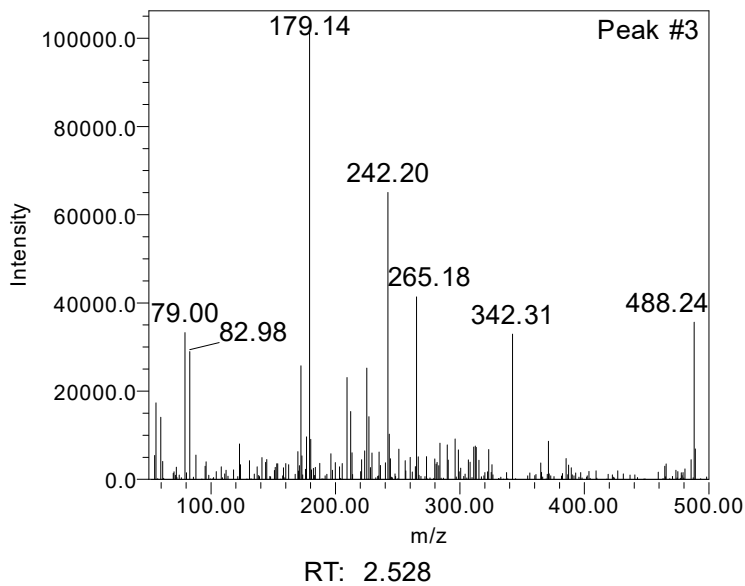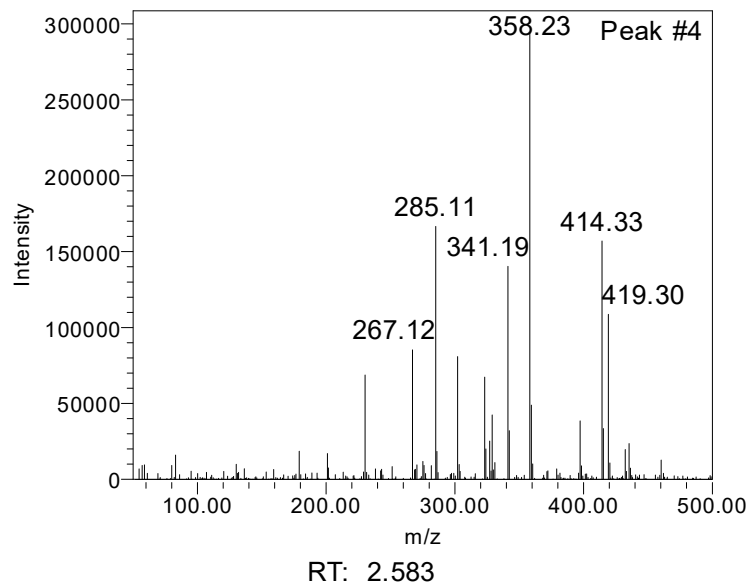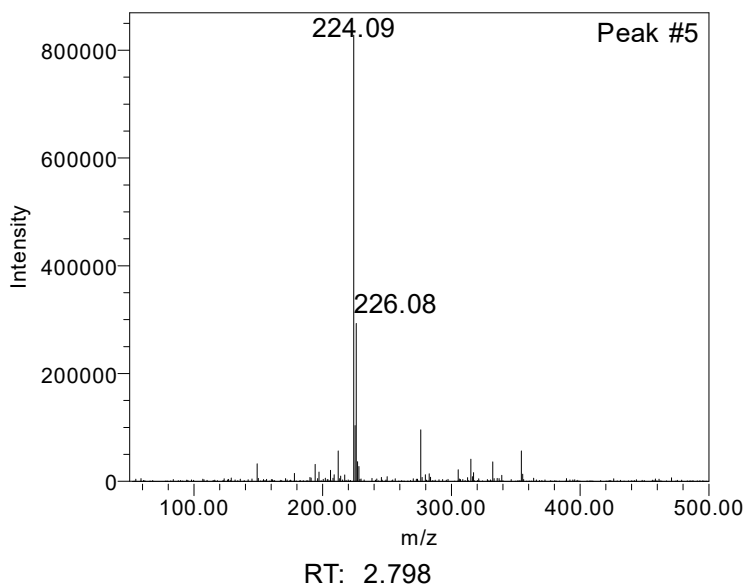

# Mass Analysis Report

## SAMPLE INFORMATION

Sample Name: 3a  
Acq Method Set: Col2\_50to500\_PosOnly

Acquired: 1/28/2022 10:27:28 PM CST  
InjVol: 7.50 uL

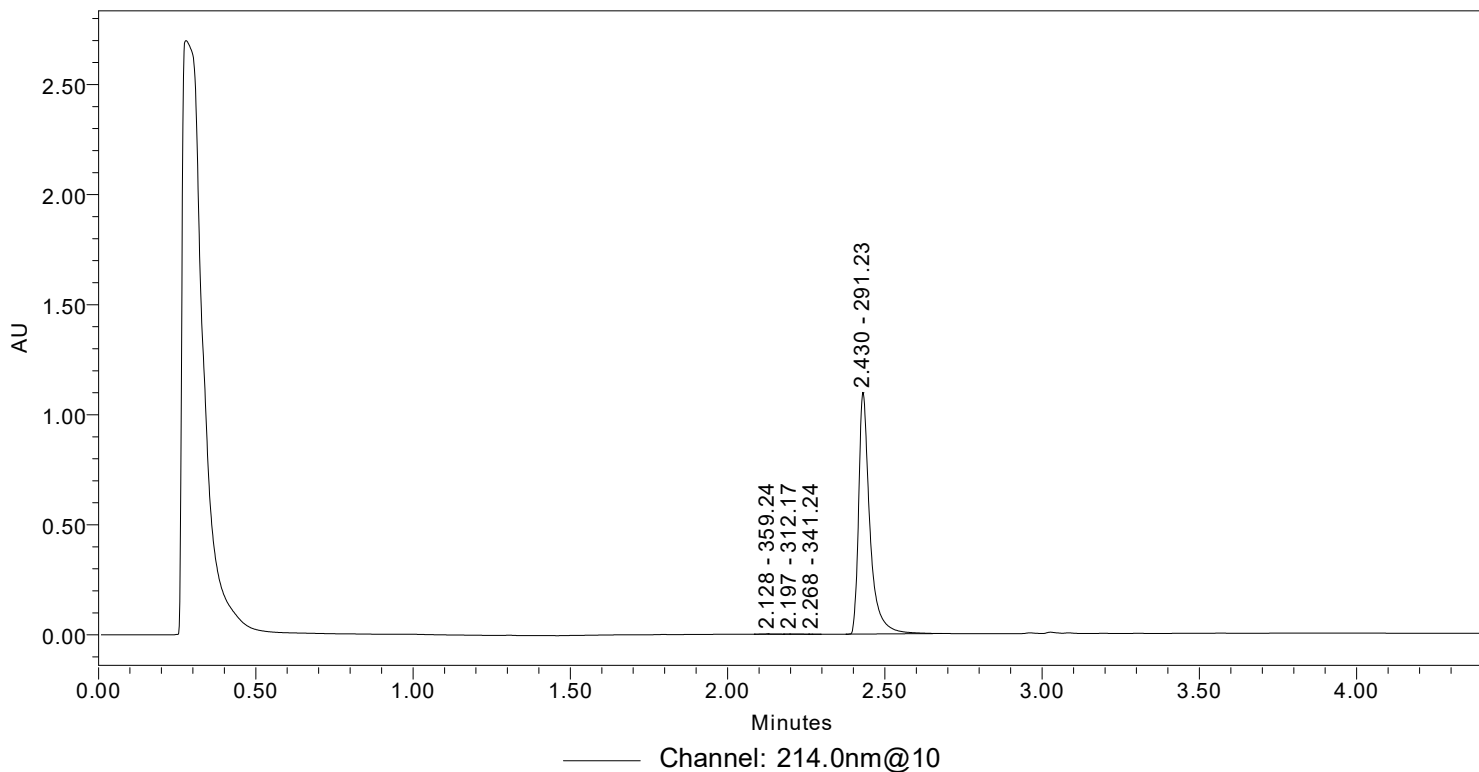

|   | RT    | Area    | % Area | Height  | Base Peak (m/z) |
|---|-------|---------|--------|---------|-----------------|
| 1 | 2.128 | 4919    | 0.18   | 1590    | 359.24          |
| 2 | 2.197 | 3898    | 0.14   | 1234    | 312.17          |
| 3 | 2.268 | 364     | 0.01   | 288     | 341.24          |
| 4 | 2.430 | 2714937 | 99.66  | 1098416 | 291.23          |

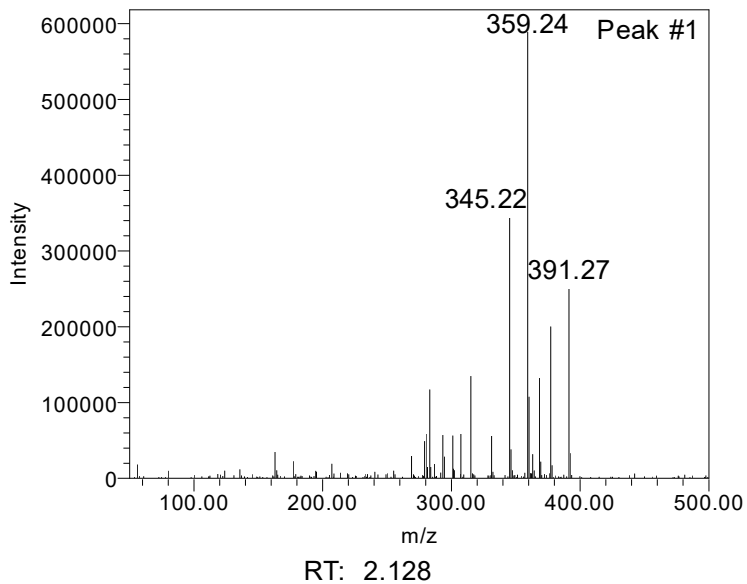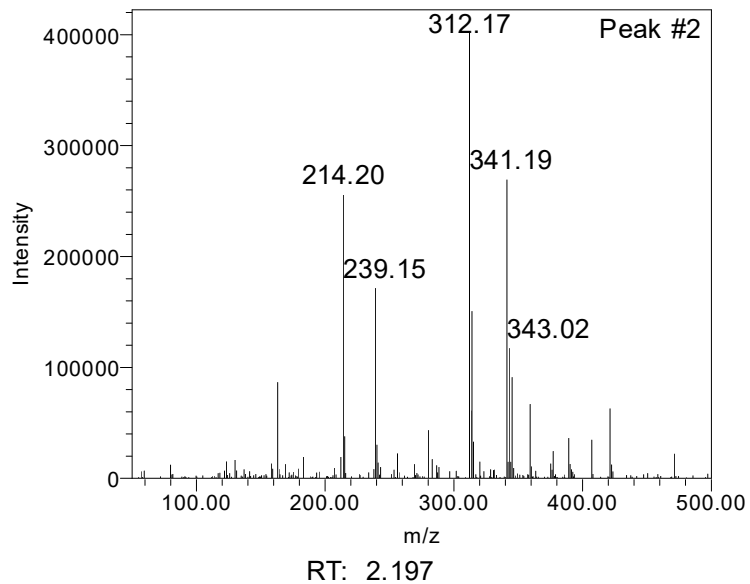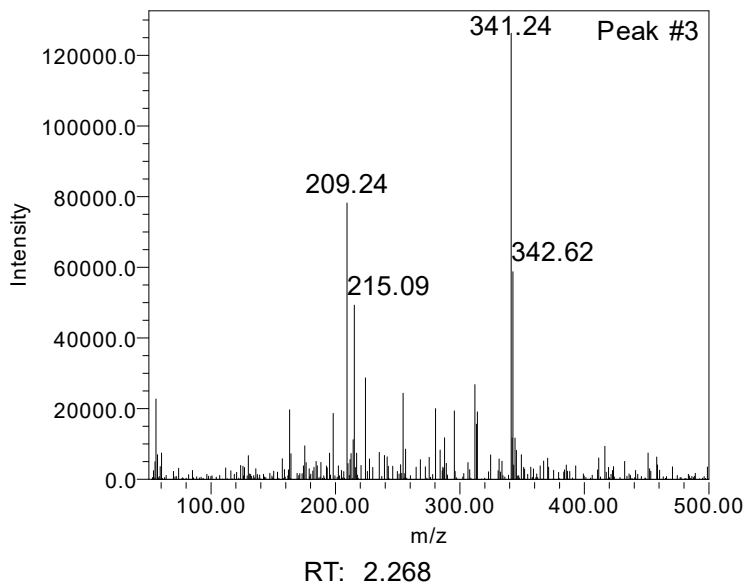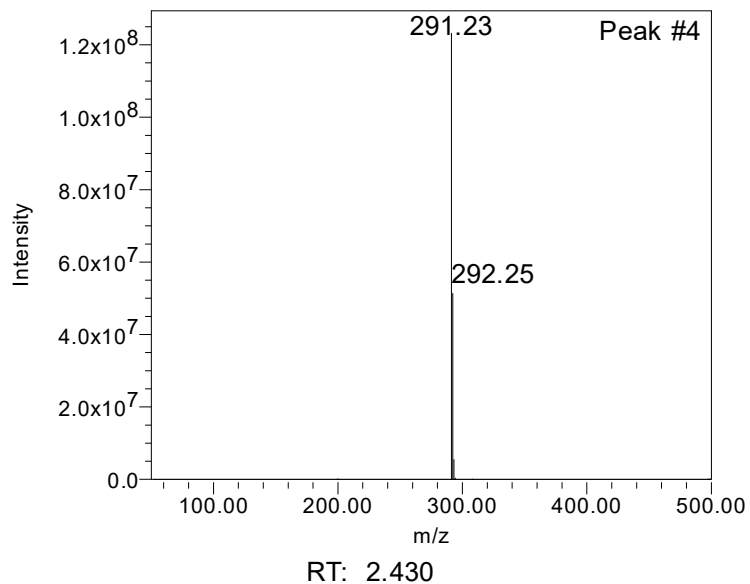

# Mass Analysis Report

## SAMPLE INFORMATION

Sample Name: 4a  
Acq Method Set: Col2\_50to500\_PosOnly

Acquired: 1/28/2022 10:34:35 PM CST  
InjVol: 7.50 uL

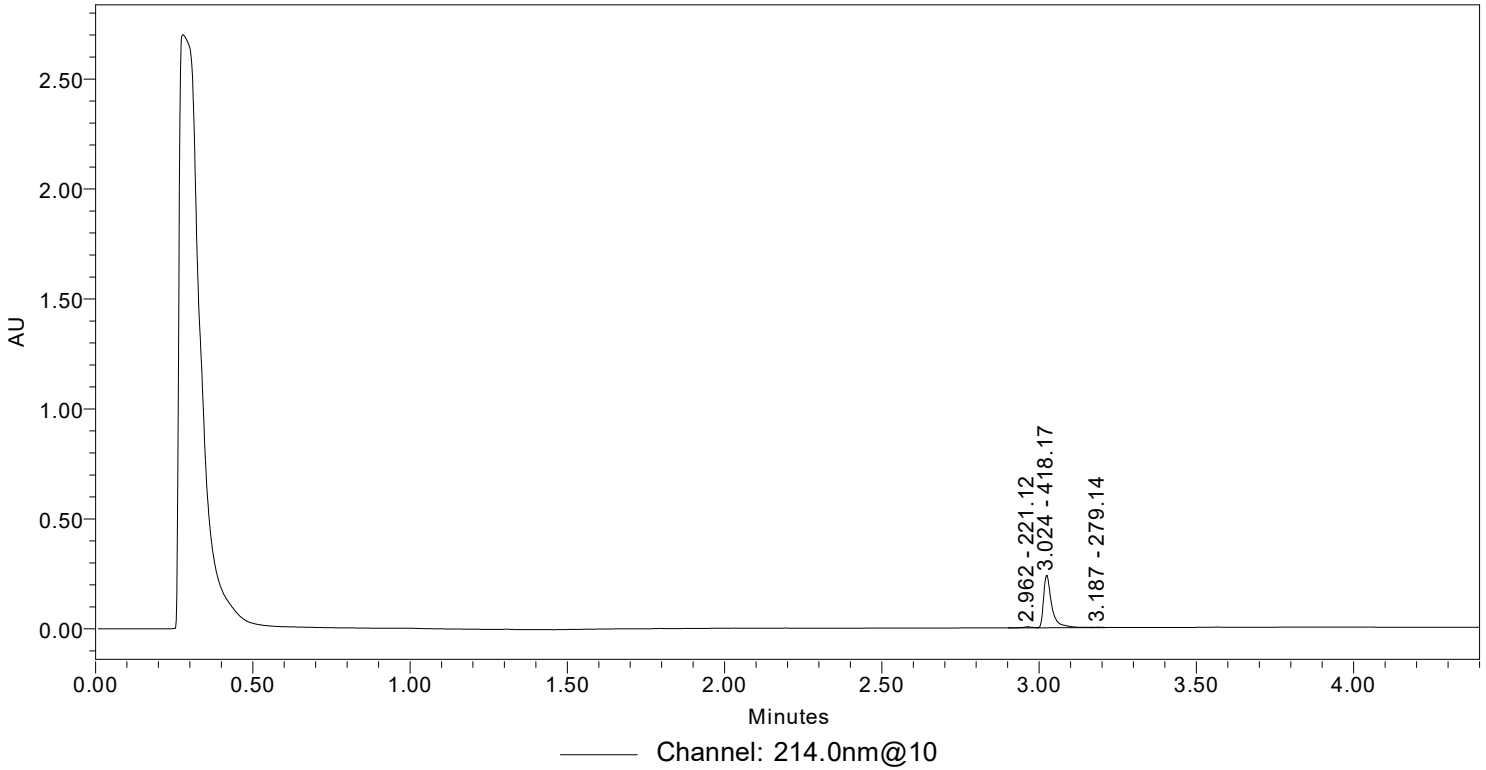

|   | RT    | Area   | % Area | Height | Base Peak (m/z) |
|---|-------|--------|--------|--------|-----------------|
| 1 | 2.962 | 8491   | 1.91   | 3932   | 221.12          |
| 2 | 3.024 | 432574 | 97.18  | 238038 | 418.17          |
| 3 | 3.187 | 4053   | 0.91   | 1755   | 279.14          |

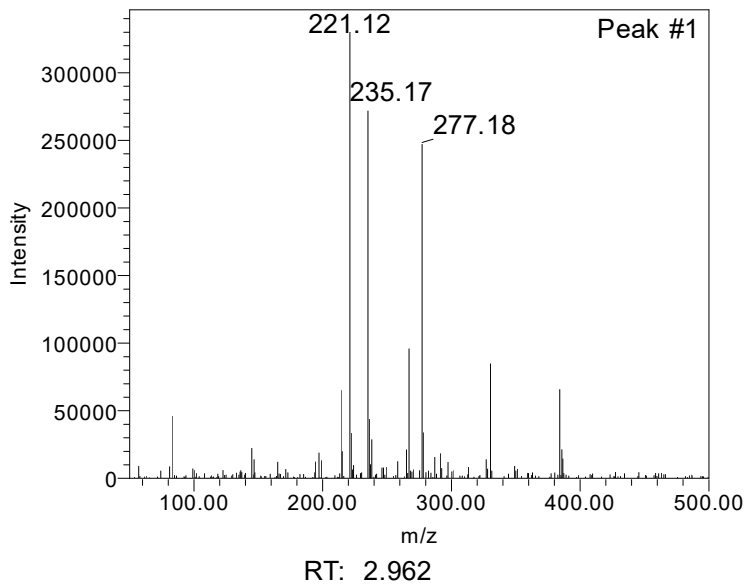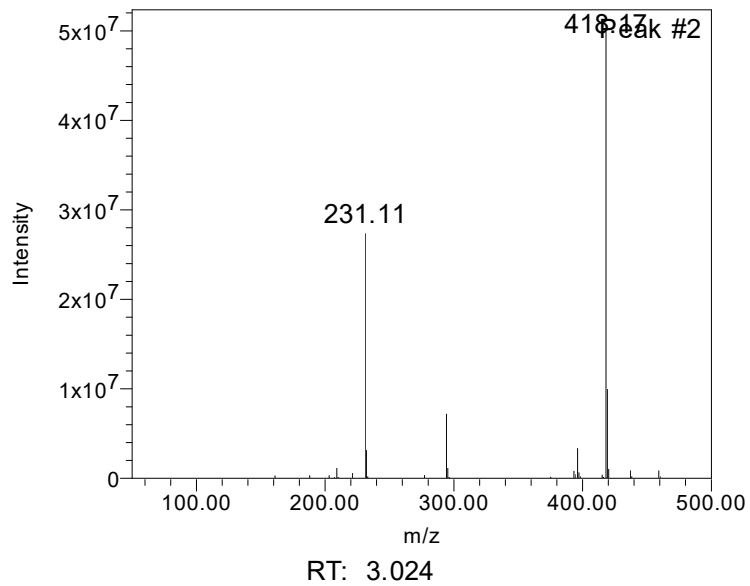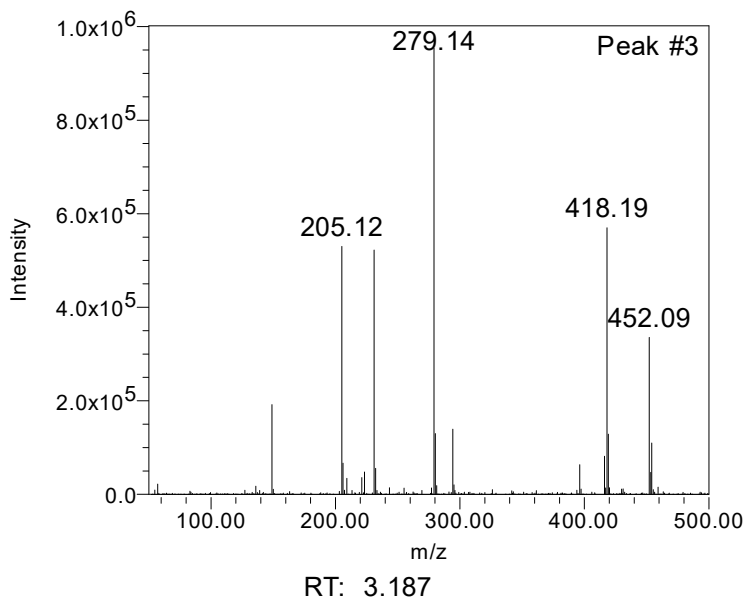

# Mass Analysis Report

## SAMPLE INFORMATION

Sample Name: 5f  
Acq Method Set: Col2\_50to500\_PosOnly

Acquired: 1/28/2022 10:41:39 PM CST  
InjVol: 7.50 uL

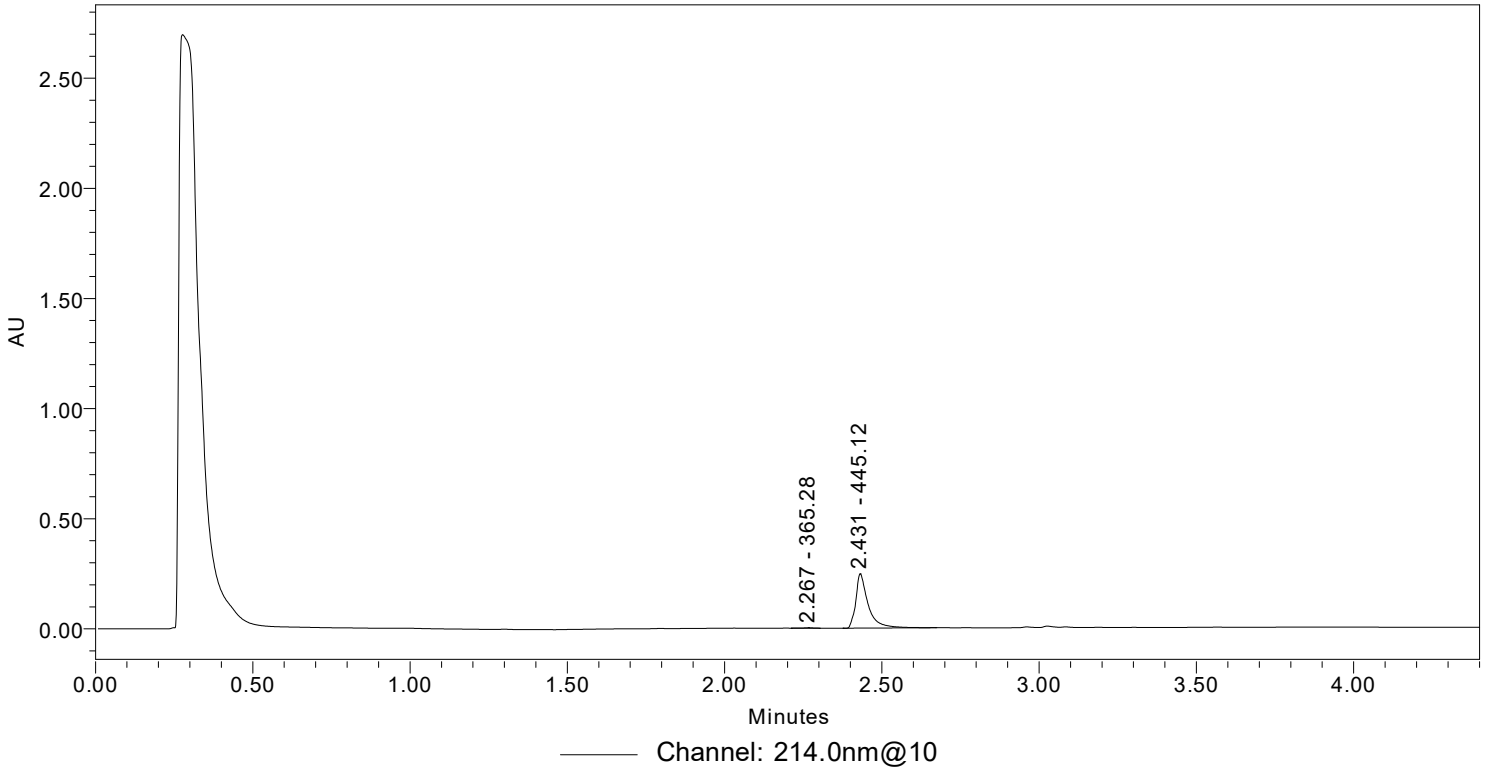

|   | RT    | Area   | % Area | Height | Base Peak (m/z) |
|---|-------|--------|--------|--------|-----------------|
| 1 | 2.267 | 4324   | 0.64   | 1859   | 365.28          |
| 2 | 2.431 | 674377 | 99.36  | 246673 | 445.12          |

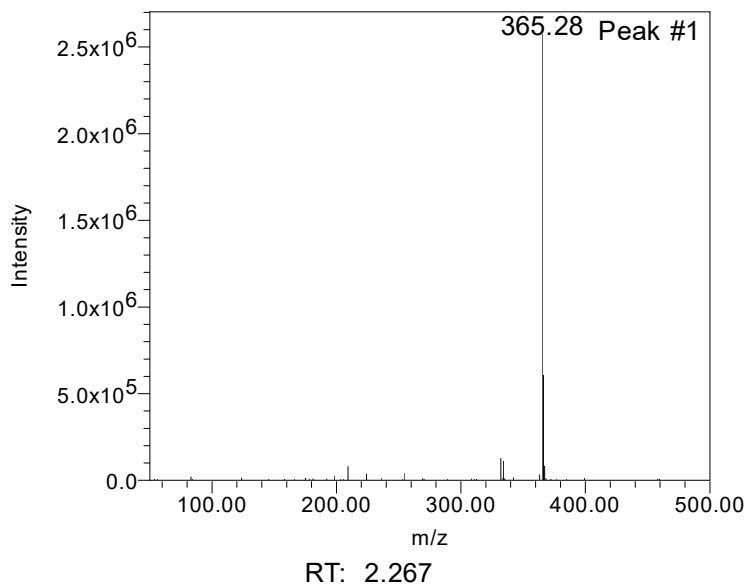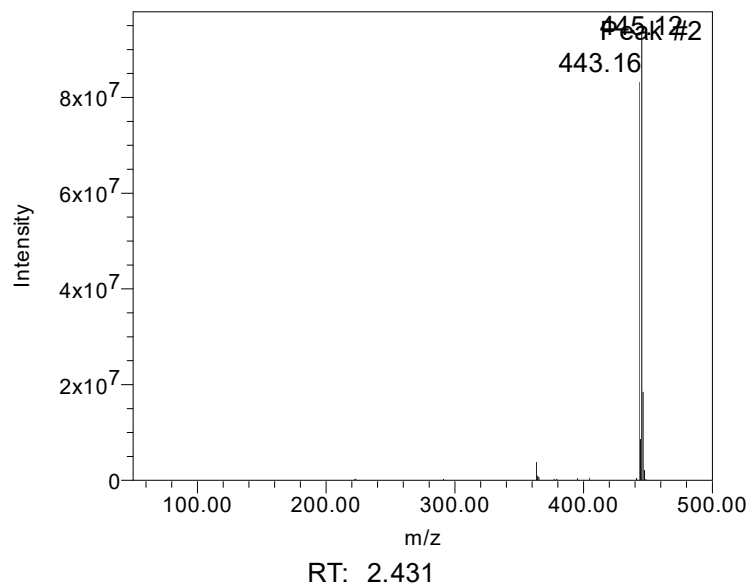



# Mass Analysis Report

## SAMPLE INFORMATION

Sample Name: 6b  
Acq Method Set: Col2\_50to500\_PosOnly

Acquired: 1/28/2022 8:47:06 PM CST  
InjVol: 3.00 uL

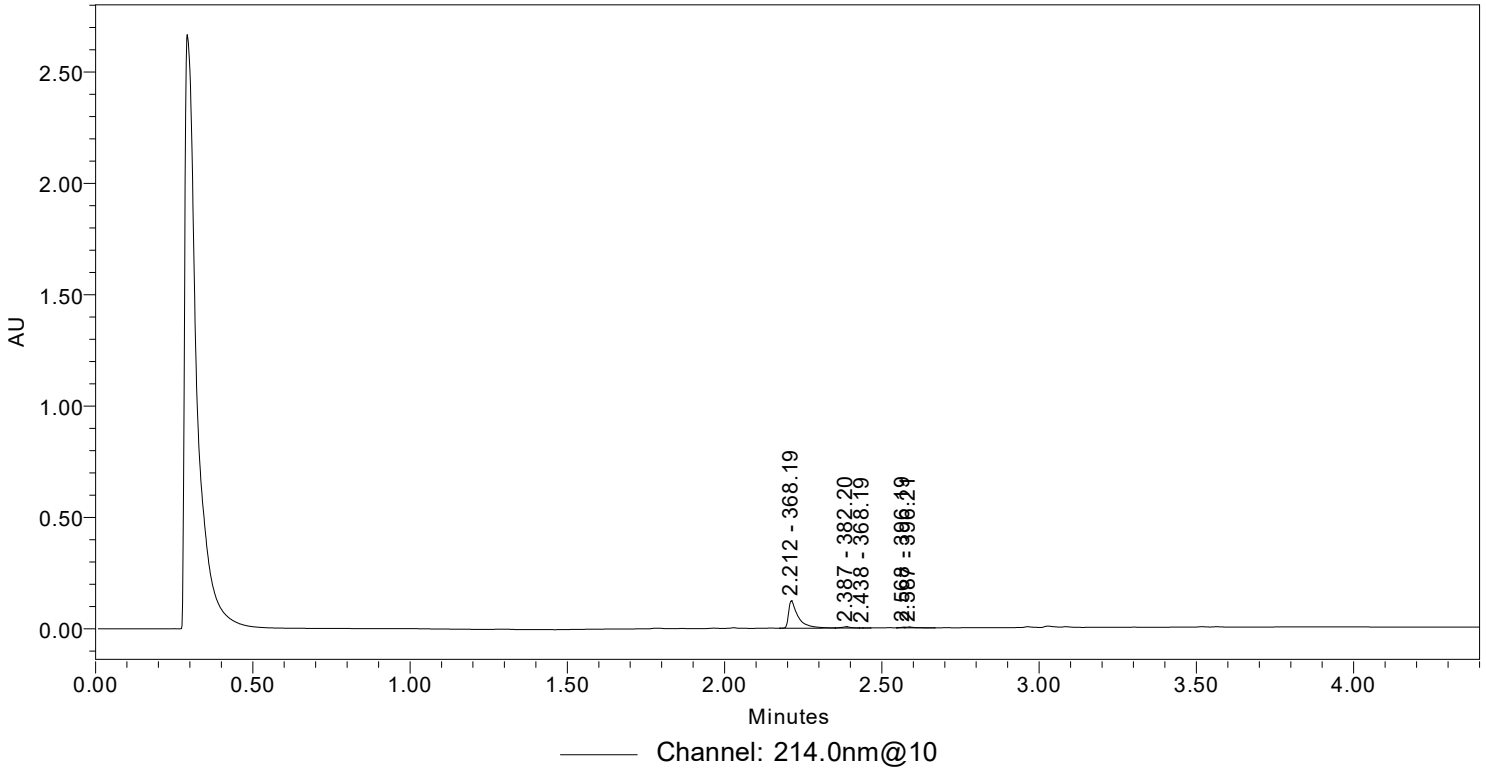

|   | RT    | Area   | % Area | Height | Base Peak (m/z) |
|---|-------|--------|--------|--------|-----------------|
| 1 | 2.212 | 261797 | 91.79  | 123446 | 368.19          |
| 2 | 2.387 | 12417  | 4.35   | 5882   | 382.20          |
| 3 | 2.438 | 1349   | 0.47   | 759    | 368.19          |
| 4 | 2.568 | 2820   | 0.99   | 2823   | 396.19          |
| 5 | 2.587 | 6844   | 2.40   | 3792   | 396.21          |

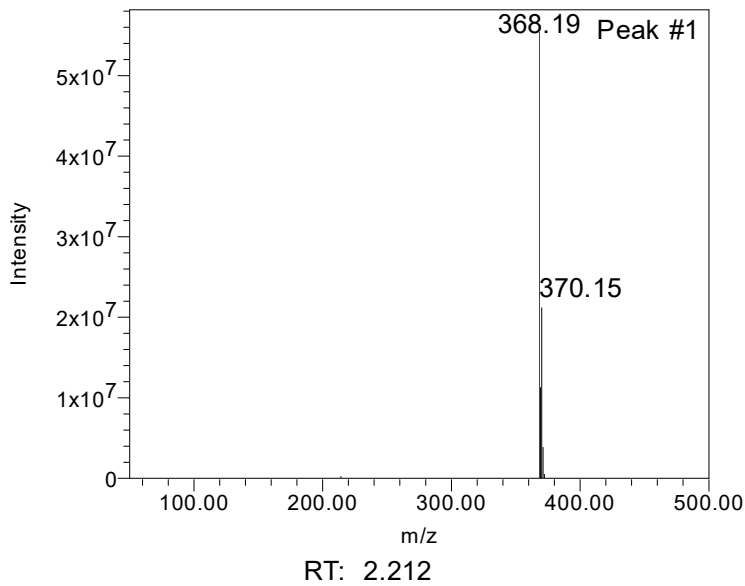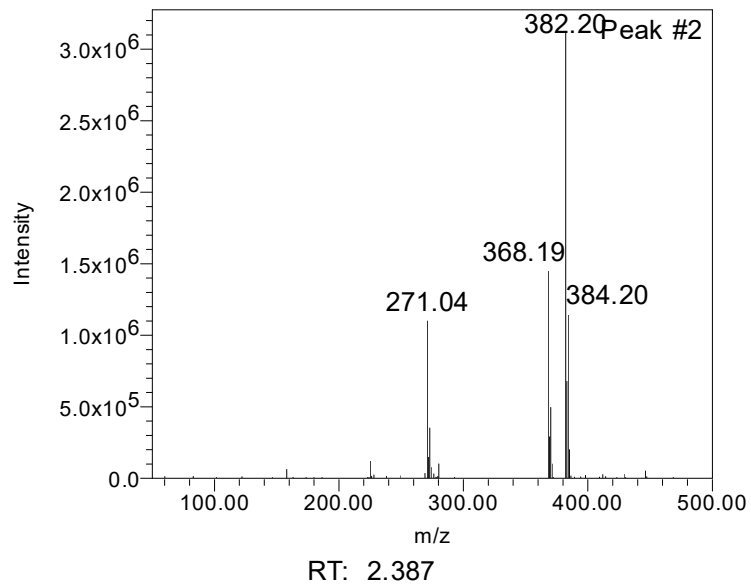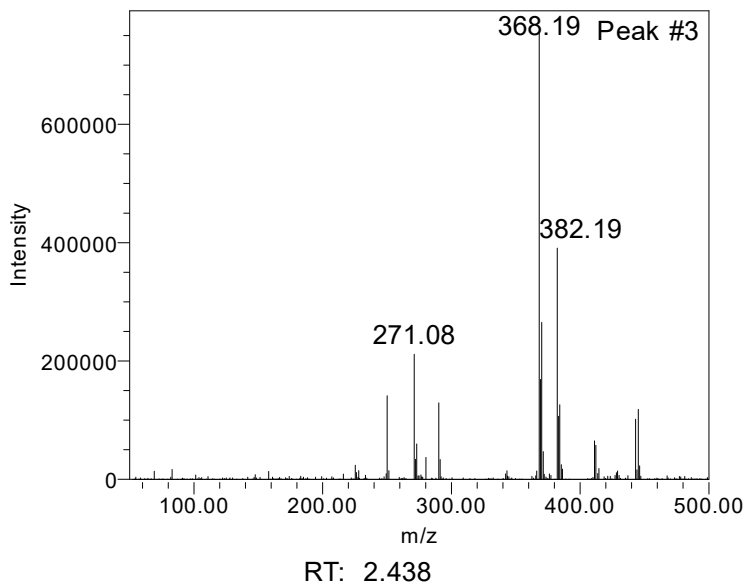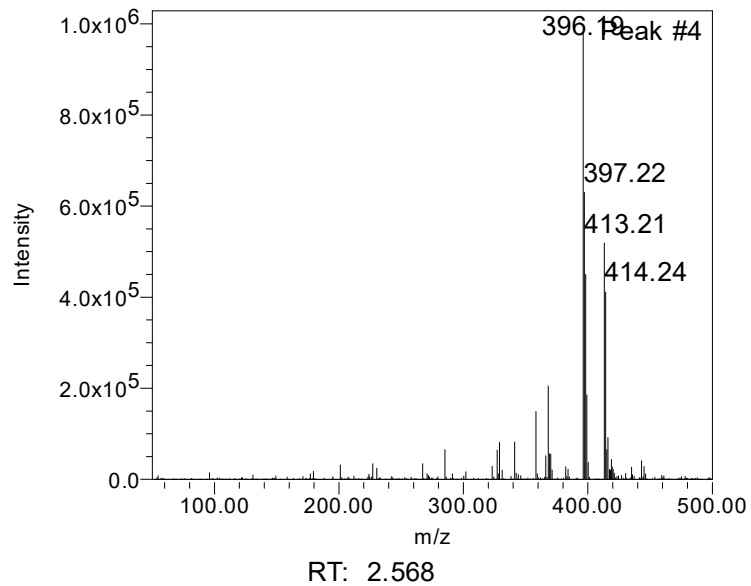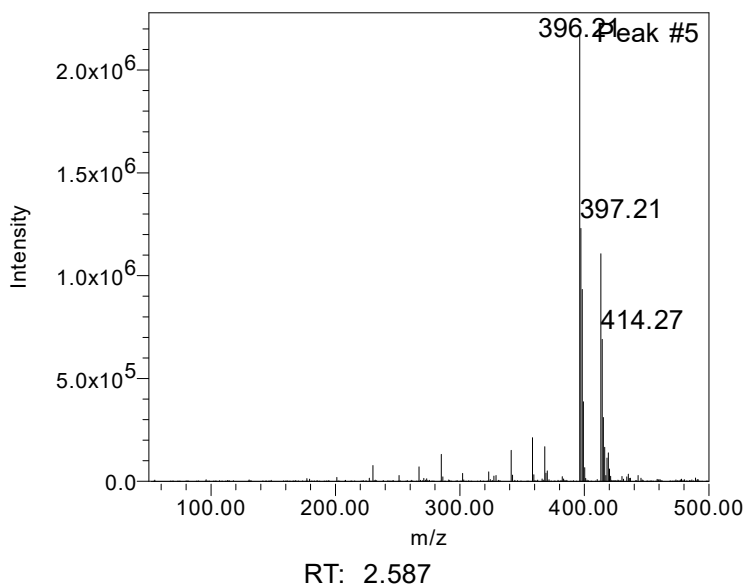

## LCMS Analysis Report

Acquired by : System Administrator  
 Sample Name : YTL-12-6-2-1  
 Injection Volume : 1  
 Data File : YTL-12-6-2-1.lcd  
 Method File : ACN-Water-0.05%TFA-5%B-1.5-3.0MIN(90-900).lcm  
 Date Acquired : 2022/2/22 17:24:34  
 Comment : Mobile phaseA:water/0.05%TFA  
           Mobile phaseB:ACN/0.05%TFA

|                   |                      |                        |                                   |
|-------------------|----------------------|------------------------|-----------------------------------|
| Instrument Name   | : Shimadzu LCMS-2020 | <<Interface>>          |                                   |
| <<Pump>>          |                      | Interface              | : ESI                             |
| Mode              | : Binary gradient    | DL Temperature         | : 250 C                           |
| Pump A            | : LC-20ADXR          | Nebulizing Gas Flow    | : 1.50 L/min                      |
| Pump B            | : LC-20ADXR          | Heat Block             | : 250 C                           |
| Total Flow        | : 1.5000 mL/min      | Drying Gas             | : On                              |
| B Conc.           | : 5.0 %              |                        | 15.00 L/min                       |
|                   |                      | <<MS Parameter>>       |                                   |
| <<Oven>>          |                      | Initial Valve Position | : -                               |
| Oven Temperature  | : 40 C               | --Segment 1 Event 1--  |                                   |
|                   |                      | Start Time             | : 0.00 min                        |
| <<PDA>>           |                      | End Time               | : 2.85 min                        |
| PDA Model         | : SPD-M20A           | Acquisition Mode       | : Scan                            |
| Lamp              | : D2                 | Polarity               | : Positive                        |
| Start Wavelength  | : 190 nm             | Event Time             | : 0.30 sec                        |
| End Wavelength    | : 400 nm             | Detector Voltage       | : +0.90 kV                        |
|                   |                      | Threshold              | : 0                               |
| <<Column>>        |                      | Start m/z              | : 90.00                           |
| Column Name       | : HALO C18           | End m/z                | : 900.00                          |
| Length            | : 30 mm              | Scan Speed             | : 3000 u/sec                      |
| Internal Diameter | : 3.0 mm             | Interface Volt.        | : Use the Data in the Tuning File |
|                   |                      | DL Volt.               | : Use the Data in the Tuning File |
|                   |                      | Qarray DC Voltage      | : Use the Data in the Tuning File |
|                   |                      | Qarray DC Voltage      | : Use the Data in the Tuning File |

<<LC Time Program>>

| Time | Module     | Command | Value |
|------|------------|---------|-------|
| 0.01 | Pumps      | B.Conc  | 5     |
| 2.00 | Pumps      | B.Conc  | 100   |
| 2.70 | Pumps      | B.Conc  | 100   |
| 2.75 | Pumps      | B.Conc  | 5     |
| 3.00 | Controller | Stop    |       |

### Chromatogram

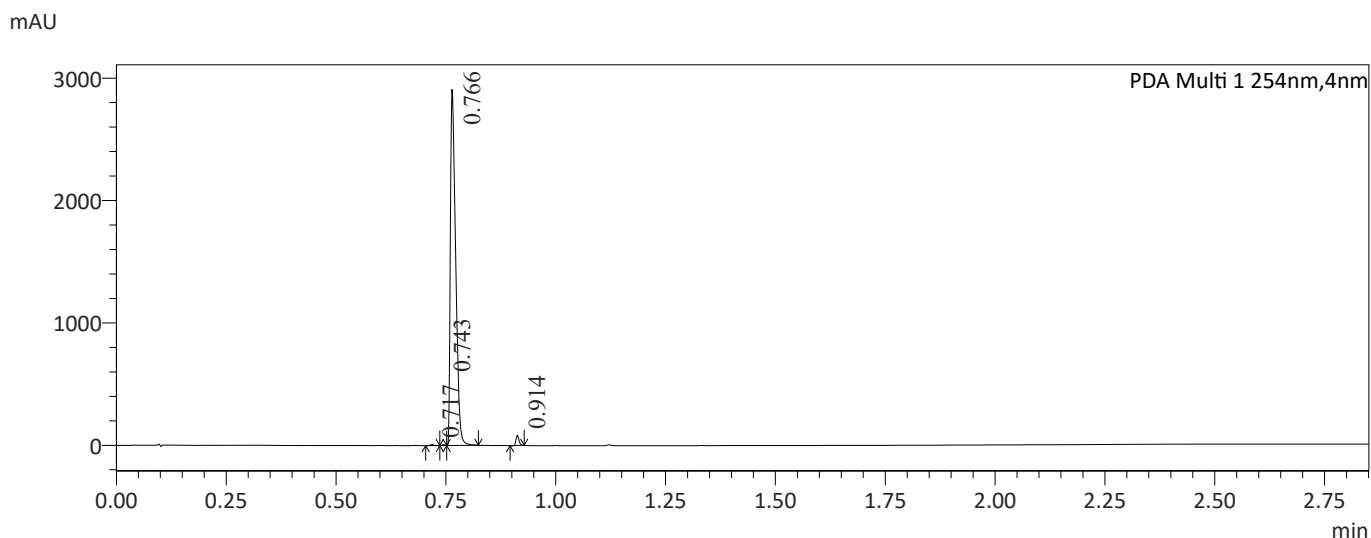

Peak Table

PDA Ch1 254nm

| Peak# | Ret. Time | Height  | Height% | Area    | Area%   |
|-------|-----------|---------|---------|---------|---------|
| 1     | 0.717     | 6809    | 0.254   | 4945    | 0.201   |
| 2     | 0.743     | 3550    | 0.132   | 3076    | 0.125   |
| 3     | 0.766     | 2633161 | 98.096  | 2417257 | 98.173  |
| 4     | 0.914     | 40753   | 1.518   | 36961   | 1.501   |
| Total |           | 2684272 | 100.000 | 2462239 | 100.000 |

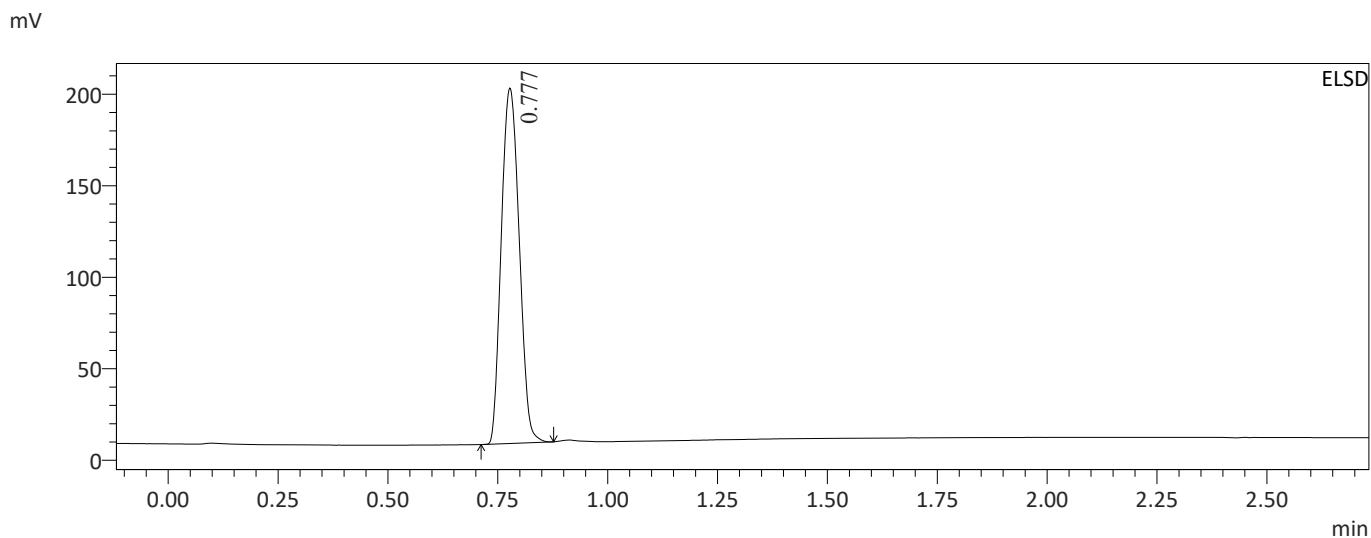

Peak Table

ELSD

| Peak# | Ret. Time | Height | Height% | Area   | Area%   |
|-------|-----------|--------|---------|--------|---------|
| 1     | 0.777     | 192746 | 100.000 | 551055 | 100.000 |
| Total |           | 192746 | 100.000 | 551055 | 100.000 |

### MS Chromatogram

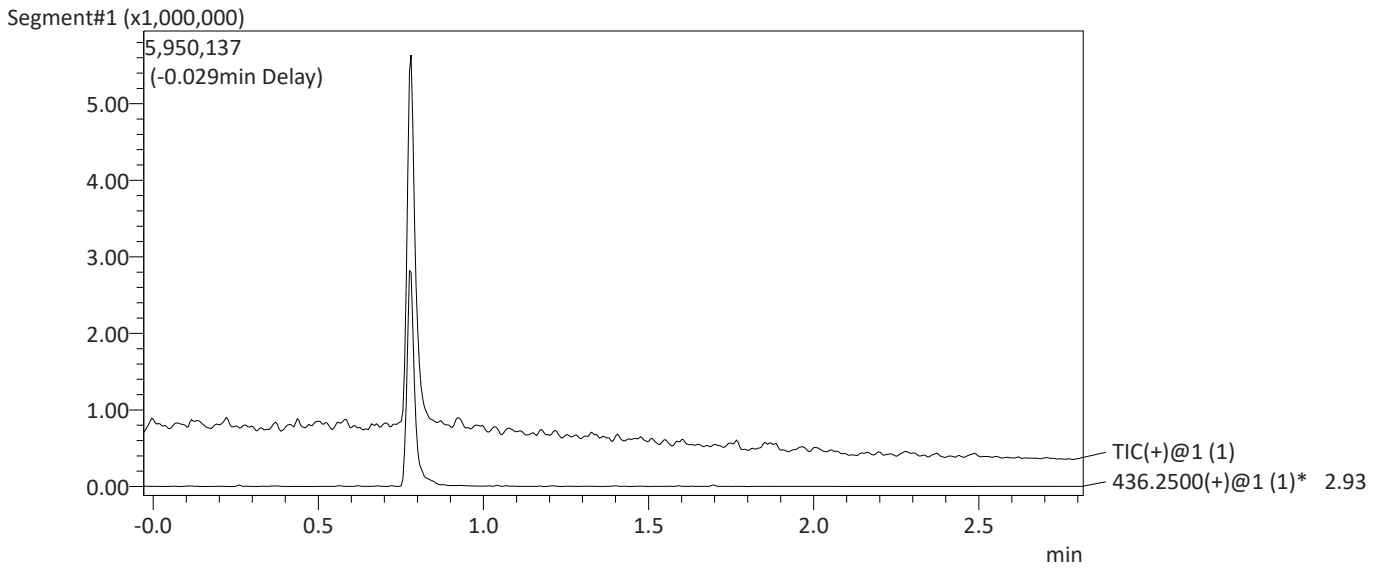

### Mass Spectrum

Retention time: 0.781

Spectrum Mode:Single 0.781(163) Base Peak:218.80(2647371)

BG Mode:Averaged 0.431-1.301(93-267) Segment 1 - Event 1

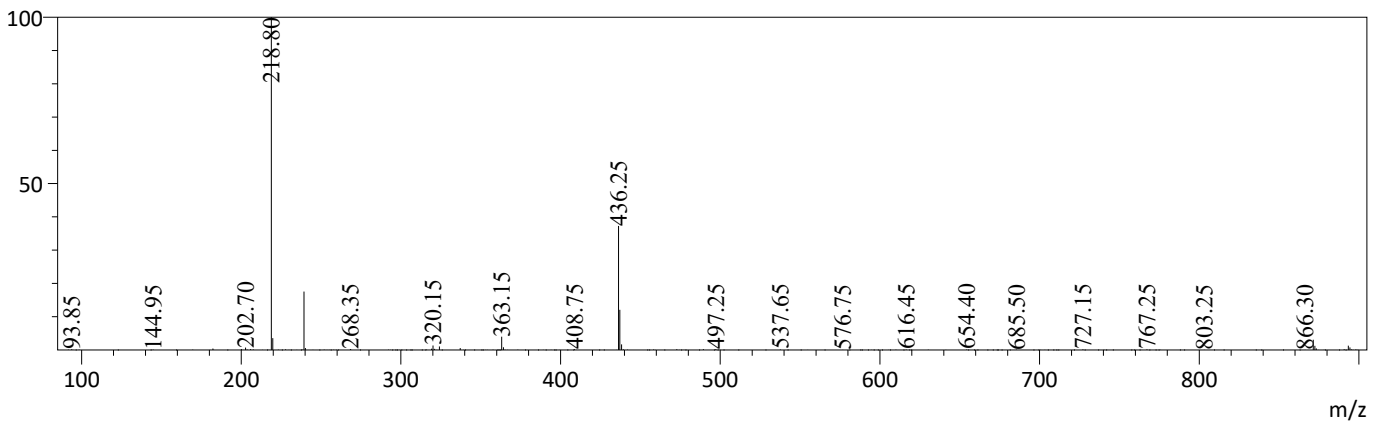

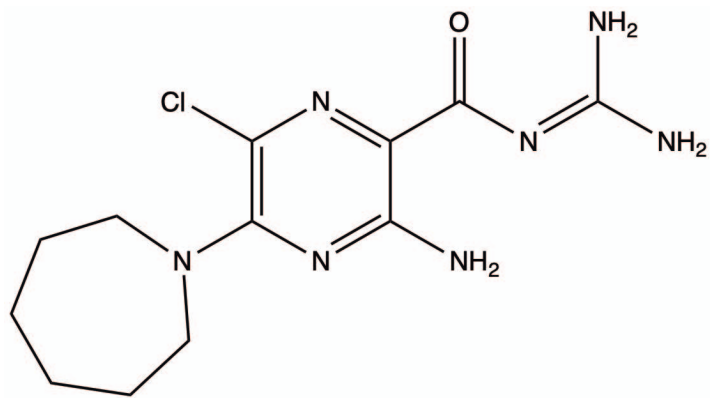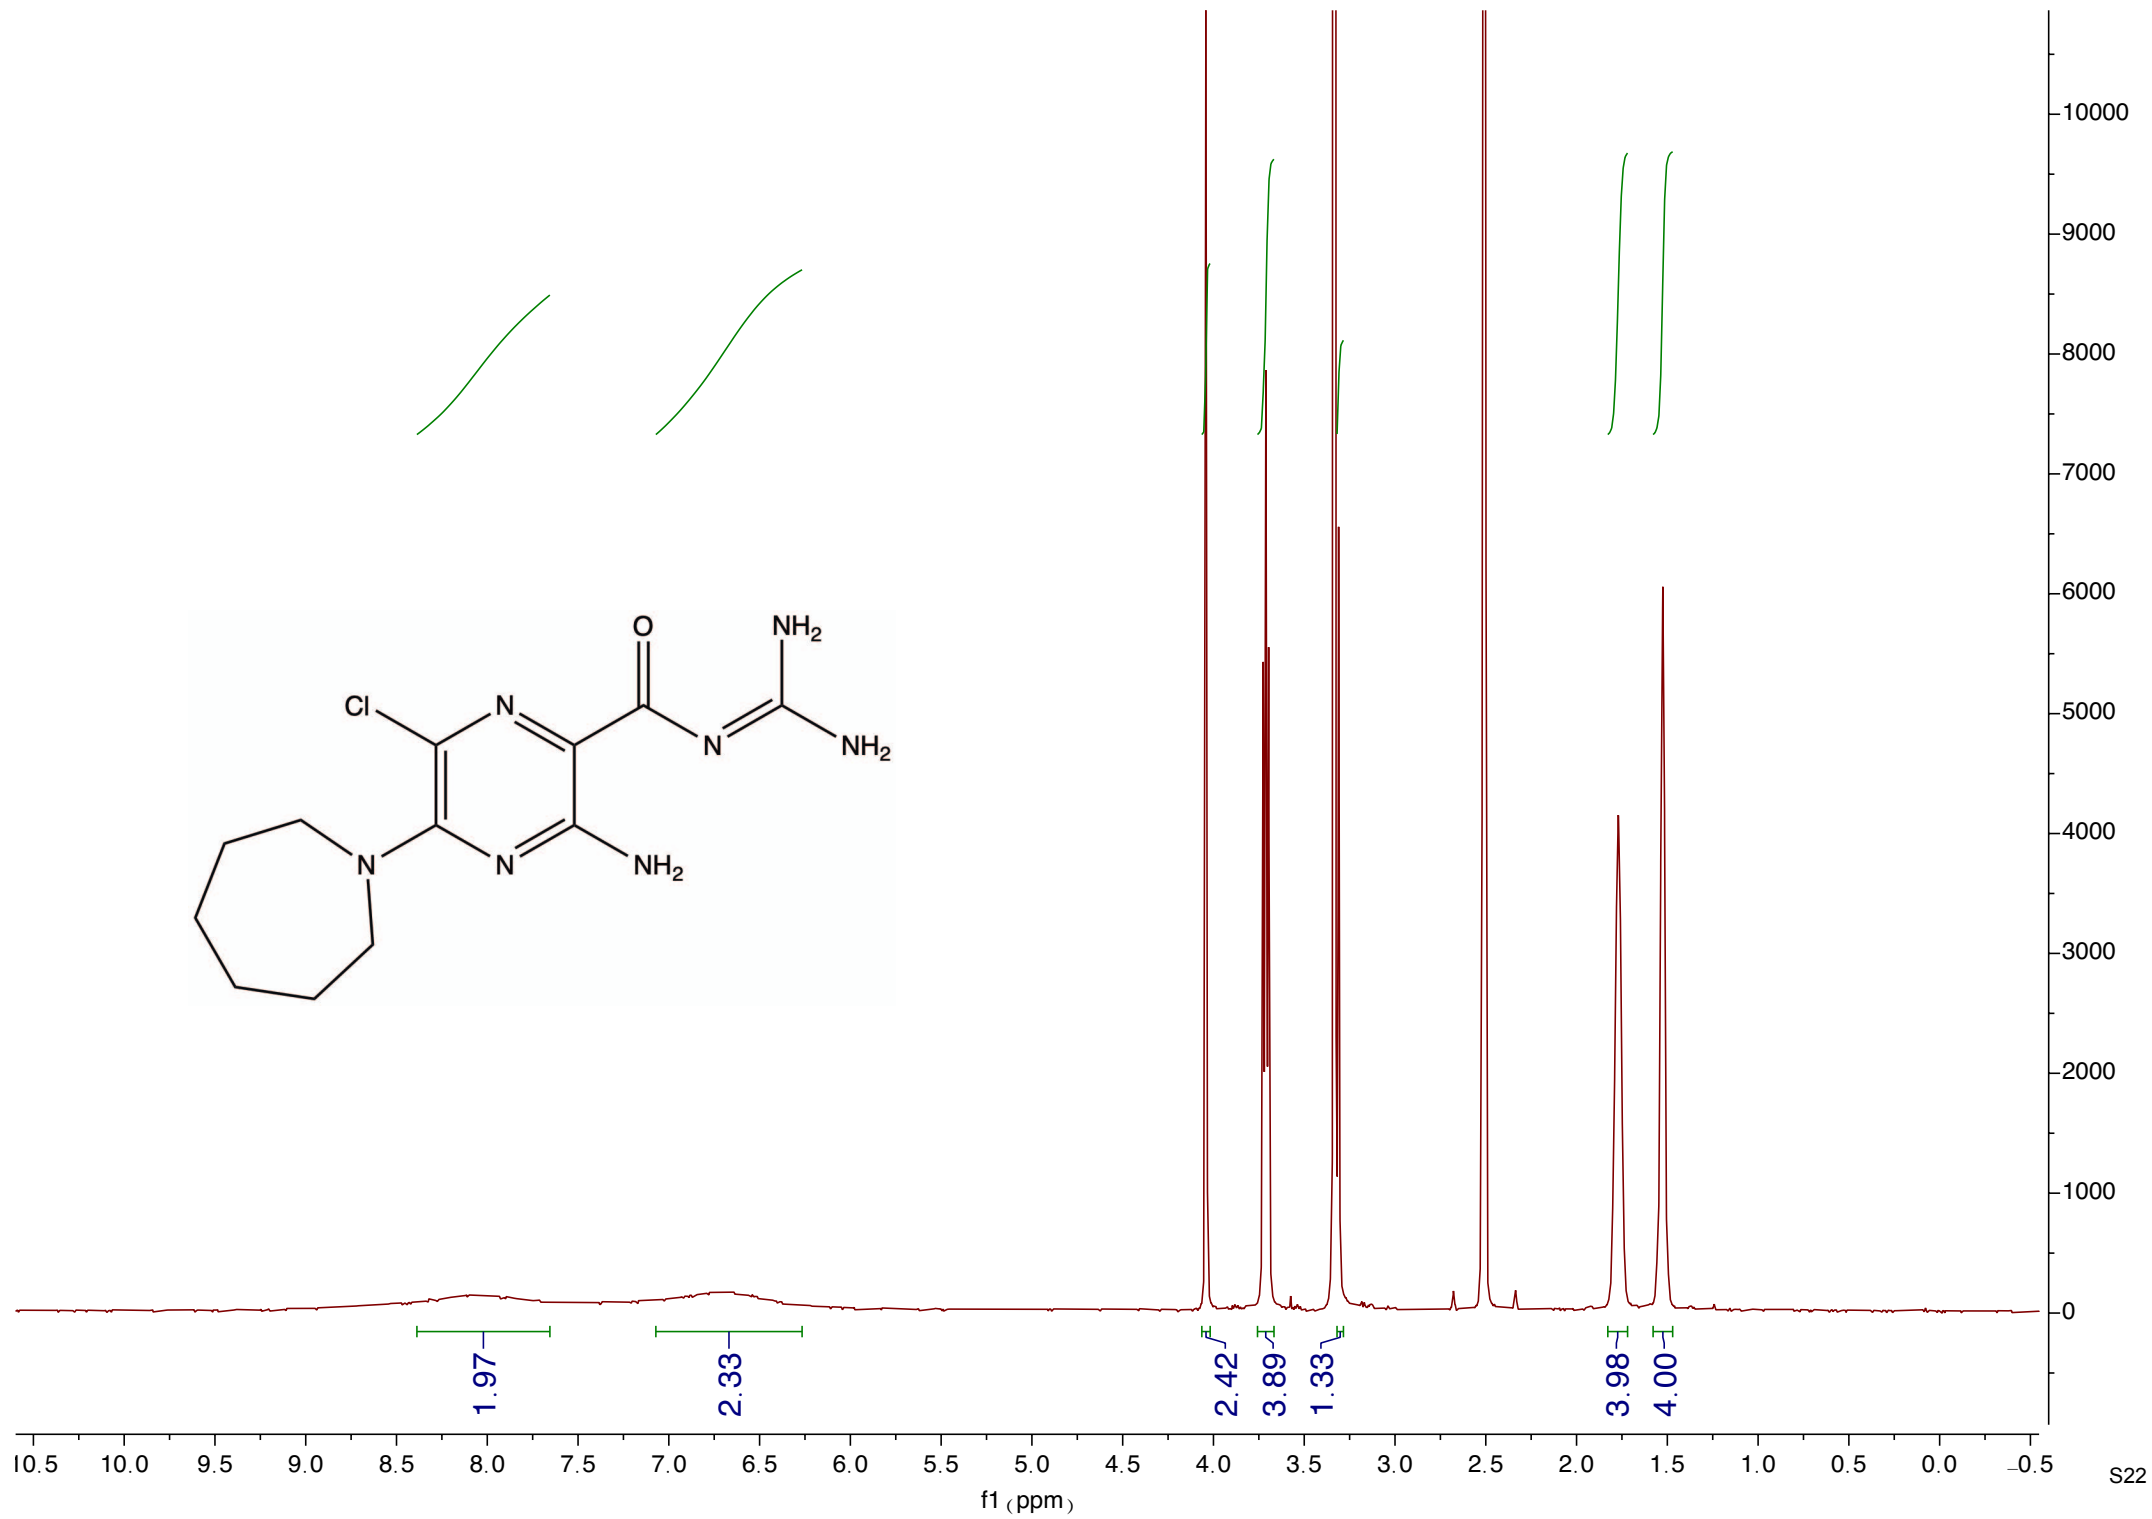

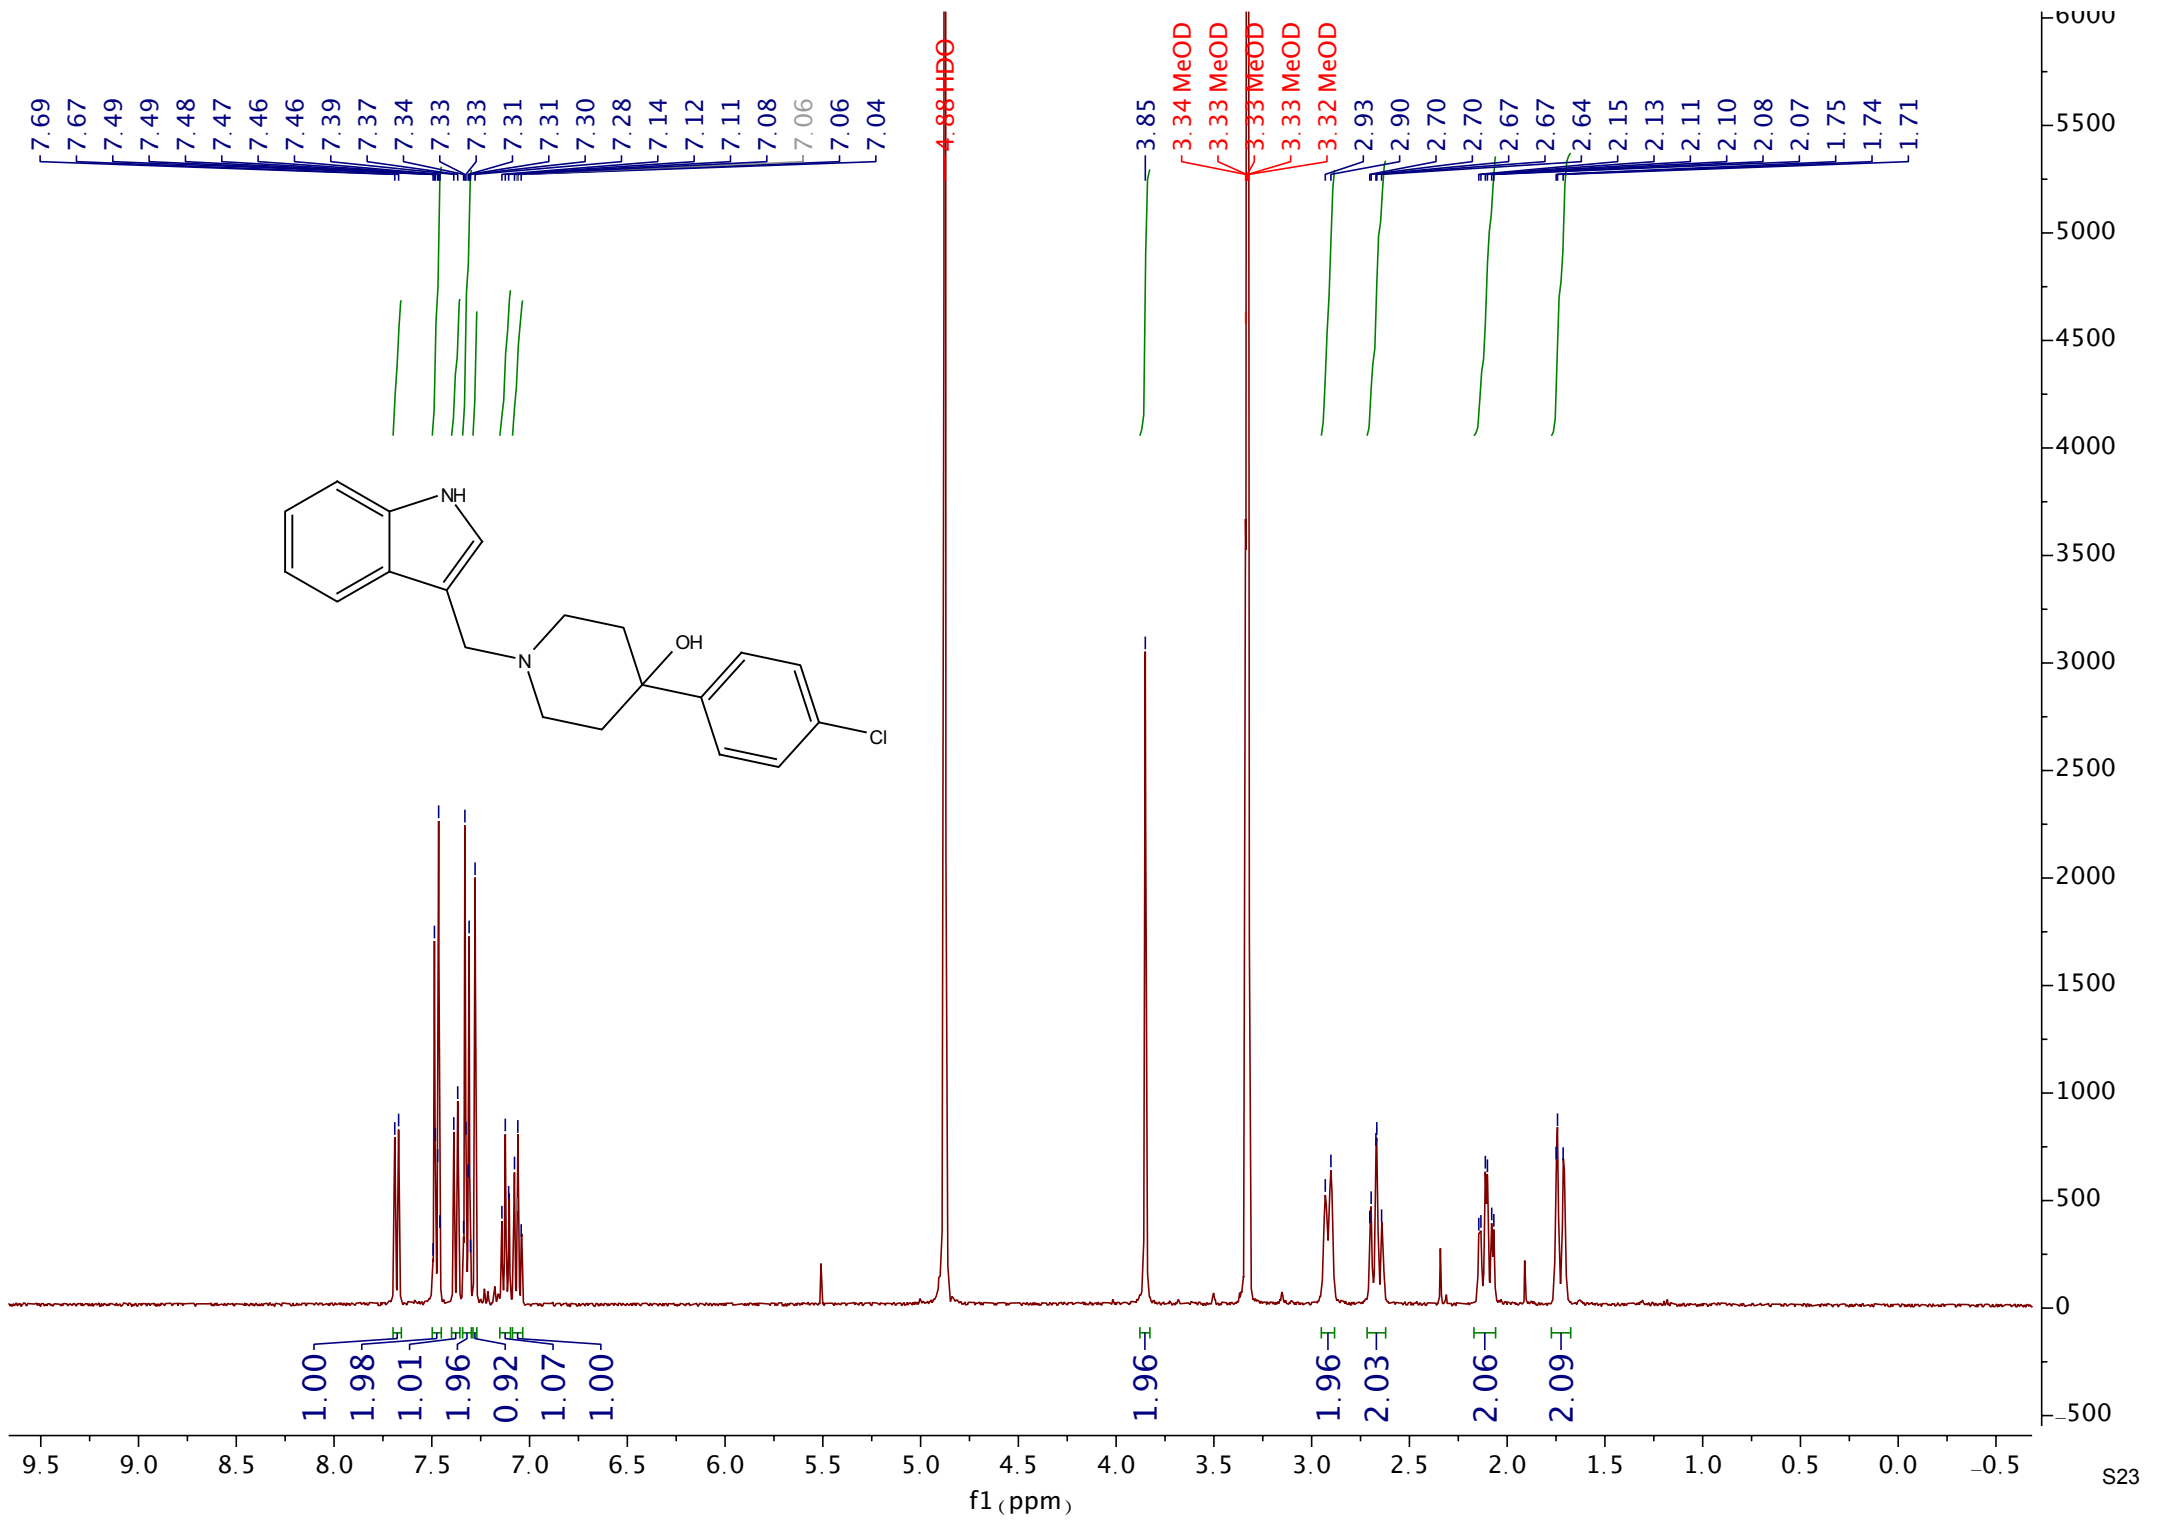

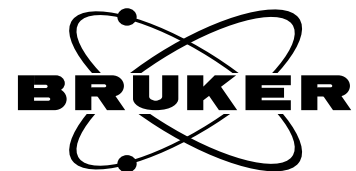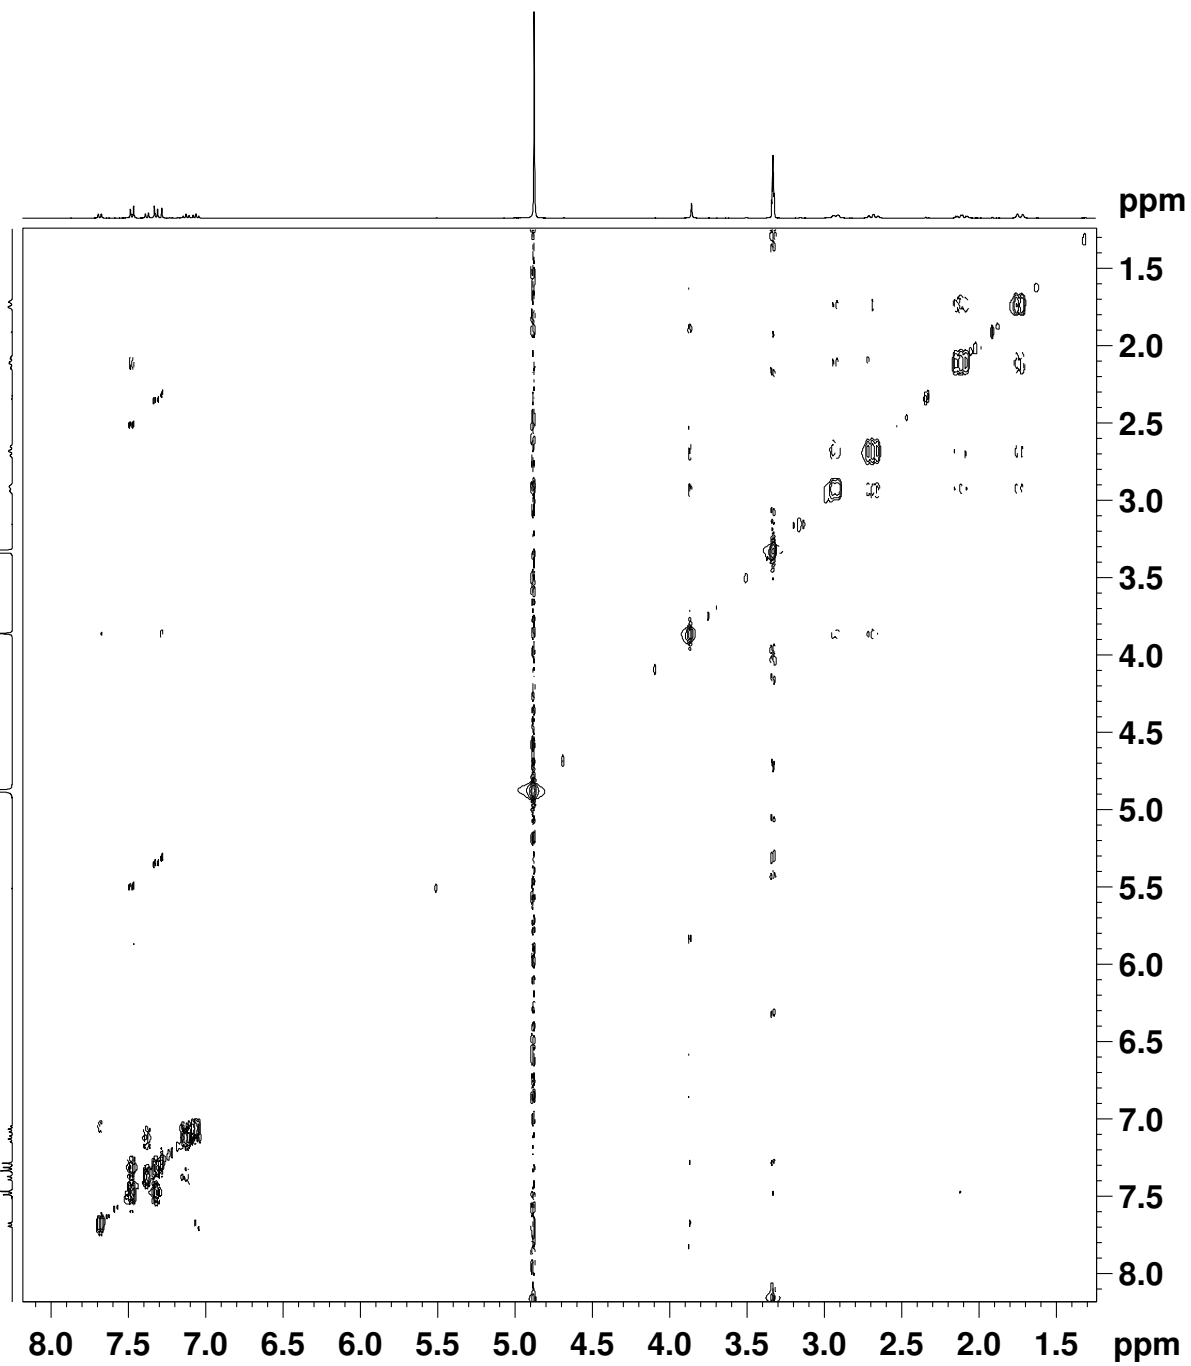

NAME 2NOESY  
EXPNO 2  
PROCNO 1  
Date\_ 20220422  
Time 22.06  
INSTRUM spect  
PROBHD 5 mm PABBO BB-  
PULPROG noesyph  
TD 2048  
SOLVENT MeOD  
NS 16  
DS 4  
SWH 2777.778 Hz  
FIDRES 1.356337 Hz  
AQ 0.3686900 sec  
RG 203  
DW 180.000 usec  
DE 6.50 usec  
TE 298.0 K  
D0 0.00015976 sec  
D1 1.88203502 sec  
D8 0.30000001 sec  
IN0 0.00036000 sec

===== CHANNEL f1 =====  
NUC1 1H  
P1 15.90 usec  
PL1 -3.00 dB  
PL1W 18.64416504 W  
SFO1 400.1318852 MHz  
ND0 1  
TD 256  
SFO1 400.1319 MHz  
FIDRES 10.850695 Hz  
SW 6.942 ppm  
FnMODE States-TPPI  
SI 1024  
SF 400.1300000 MHz  
WDW QSINE  
SSB 2  
LB 0.00 Hz  
GB 0  
PC 1.00  
SI 1024  
MC2 States-TPPI  
SF 400.1300000 MHz  
WDW QSINE  
SSB 2  
LB 0.00 Hz  
GB 0



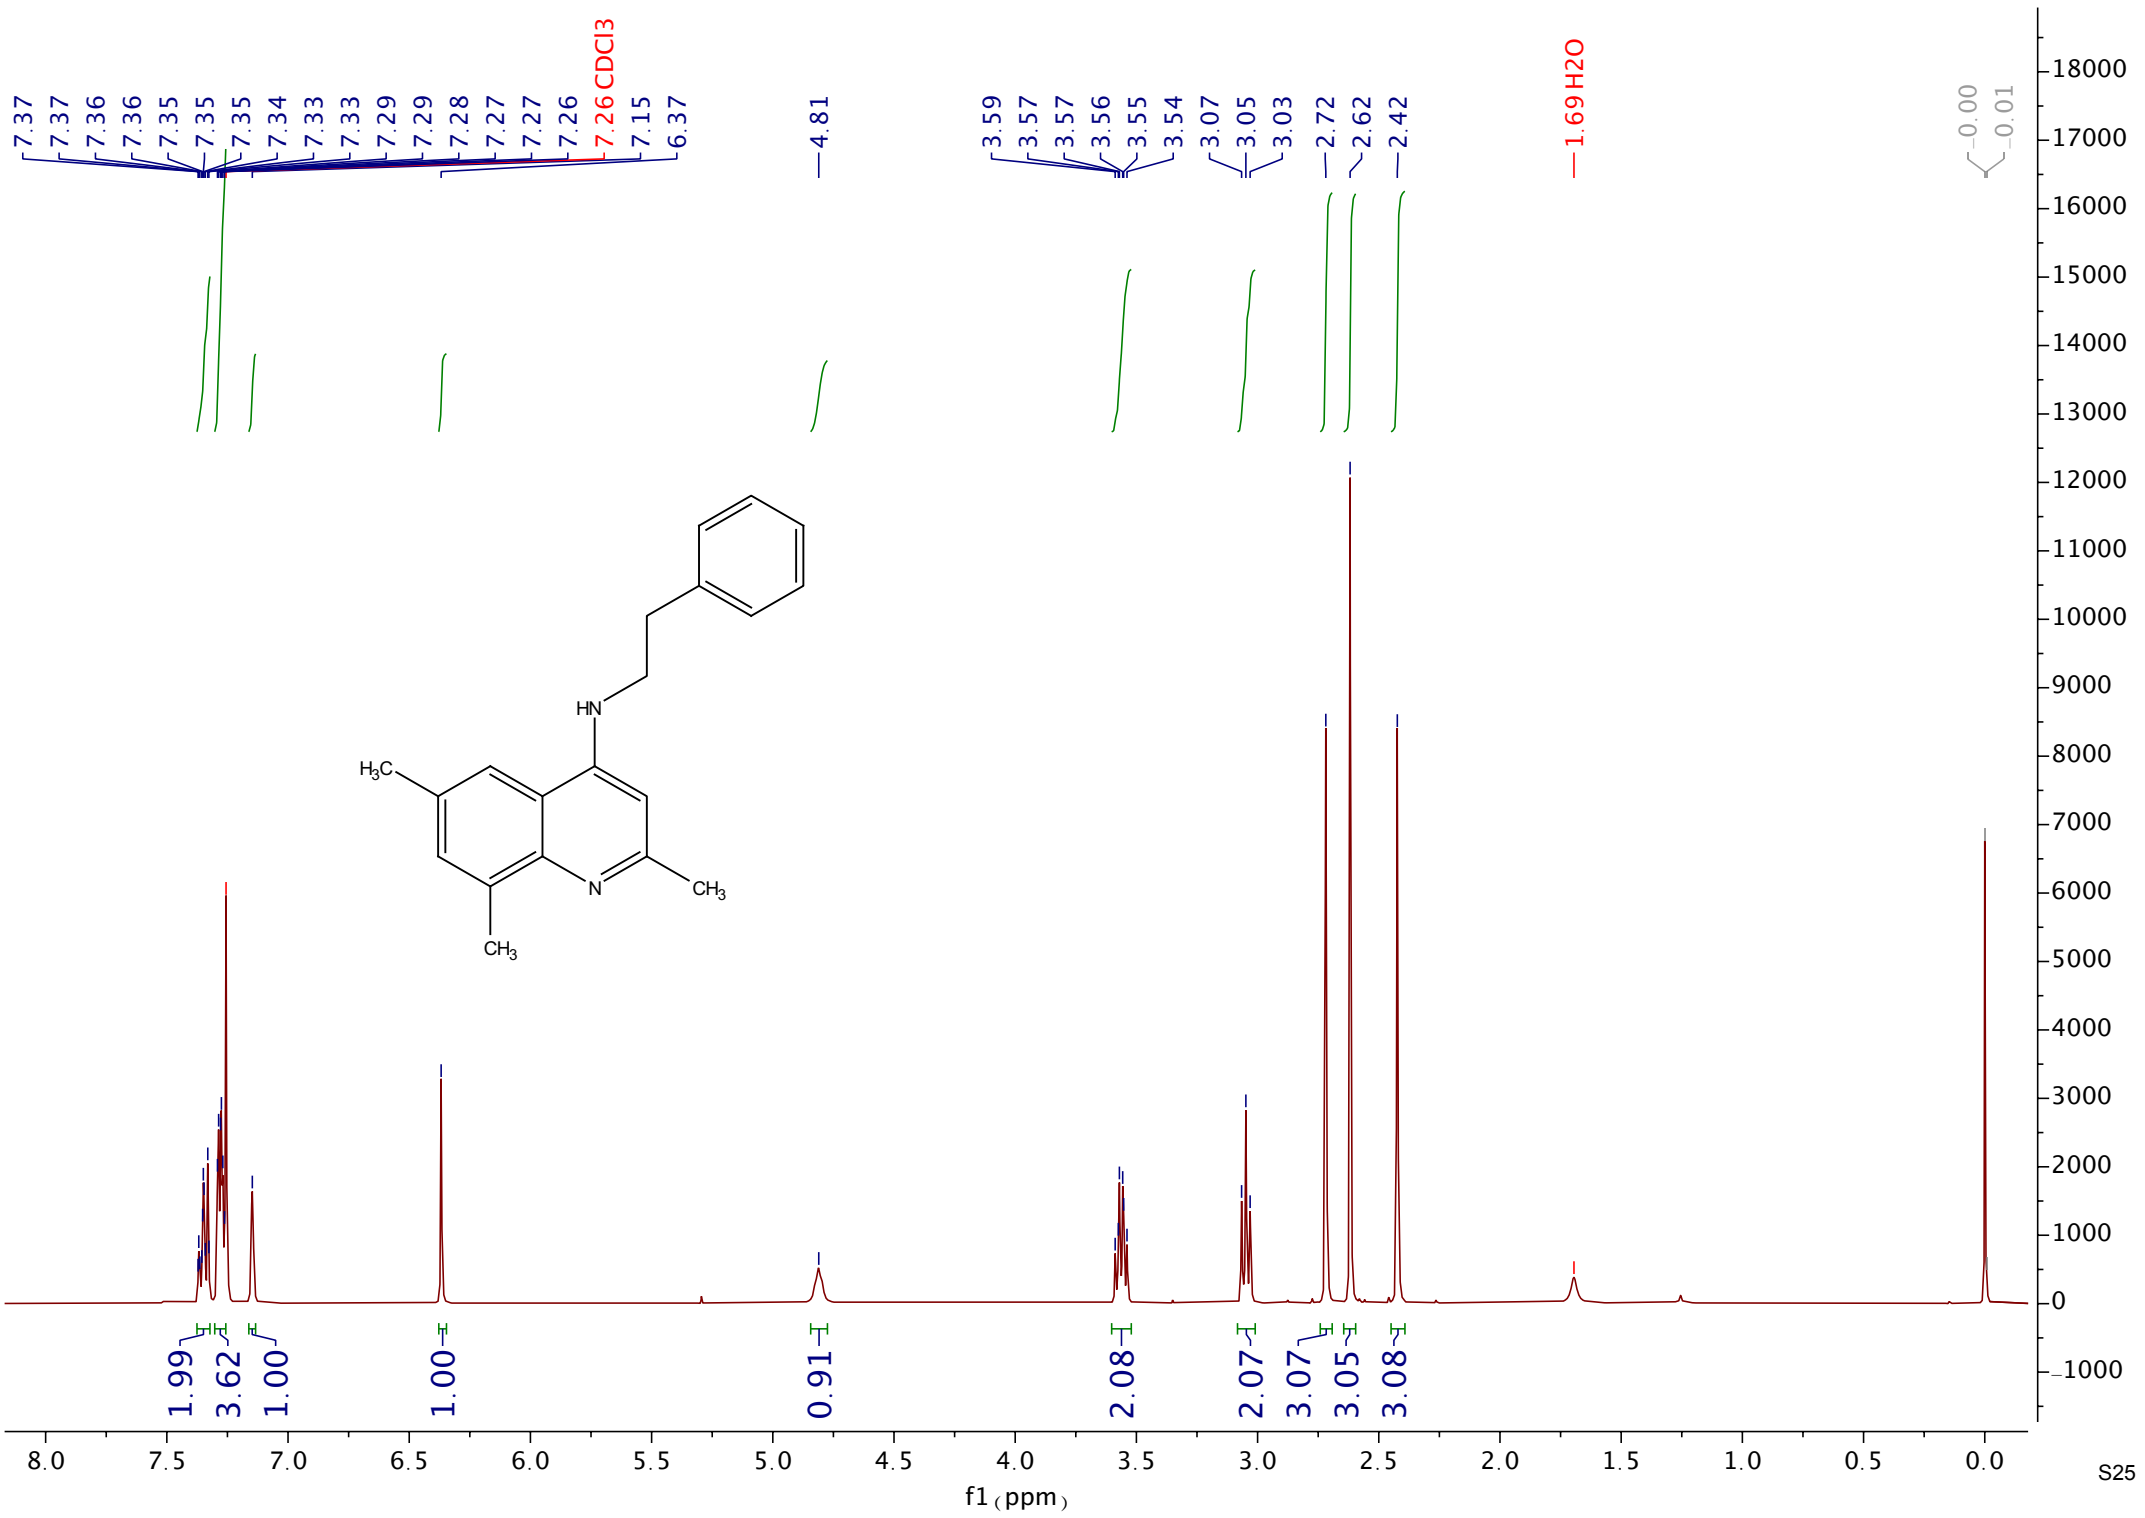

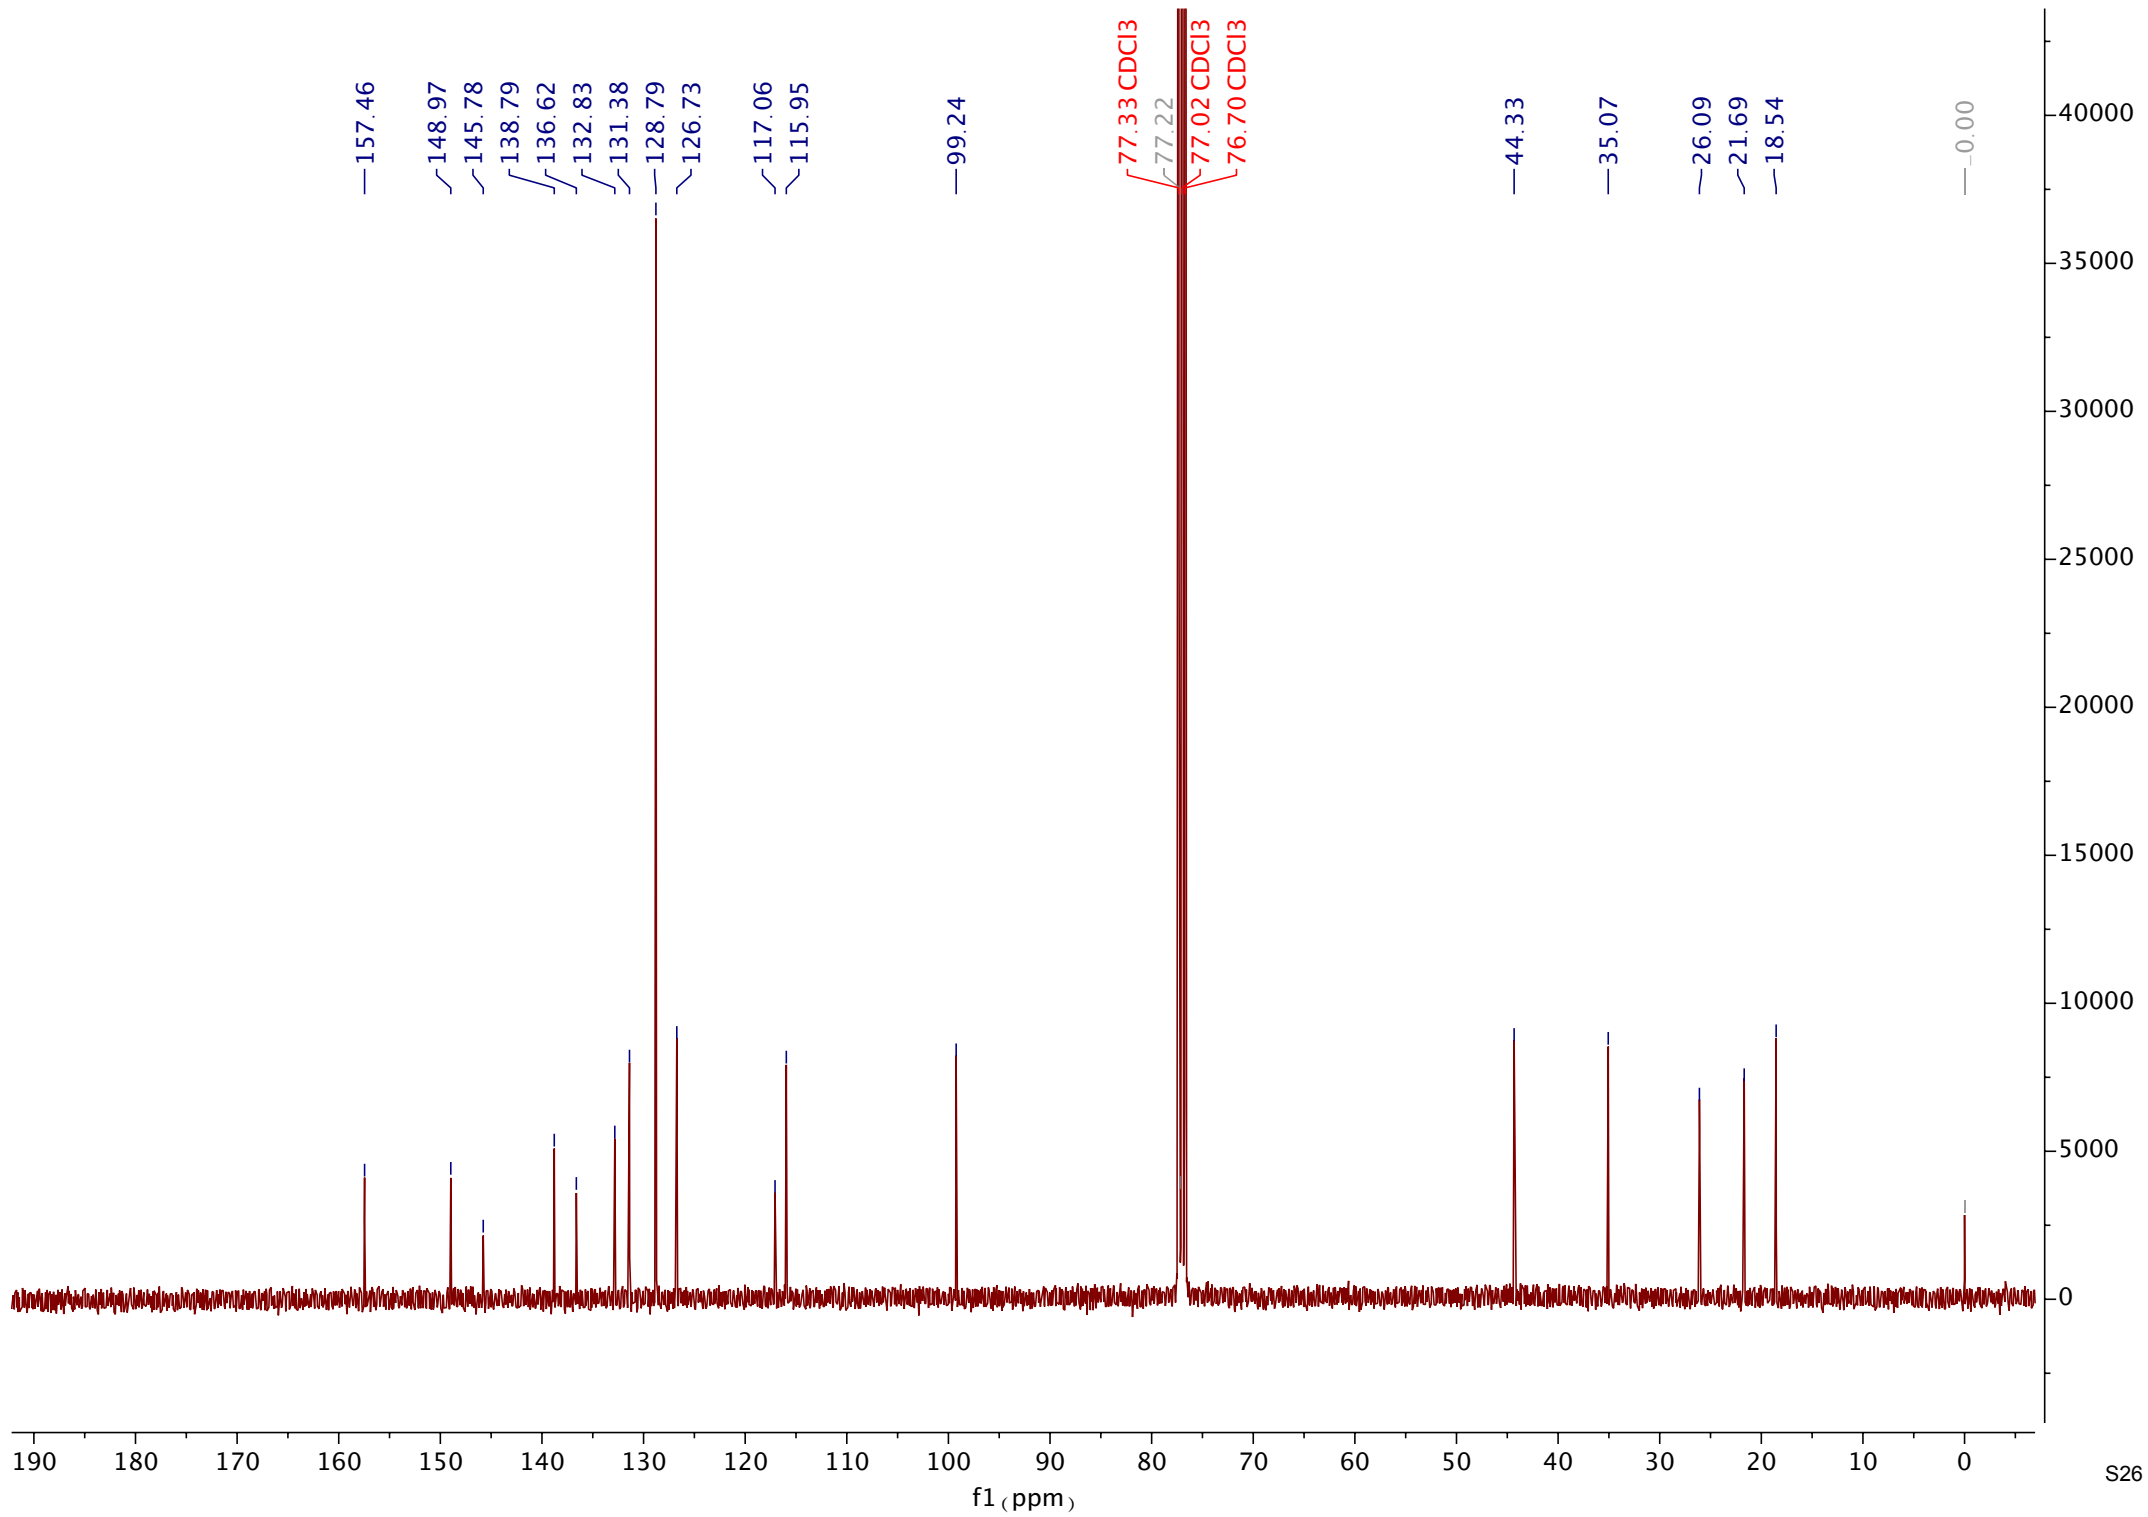

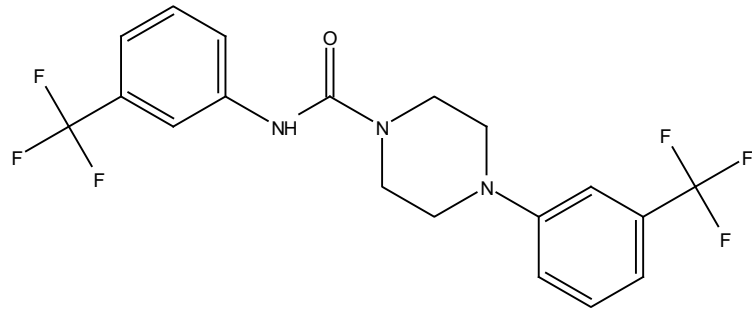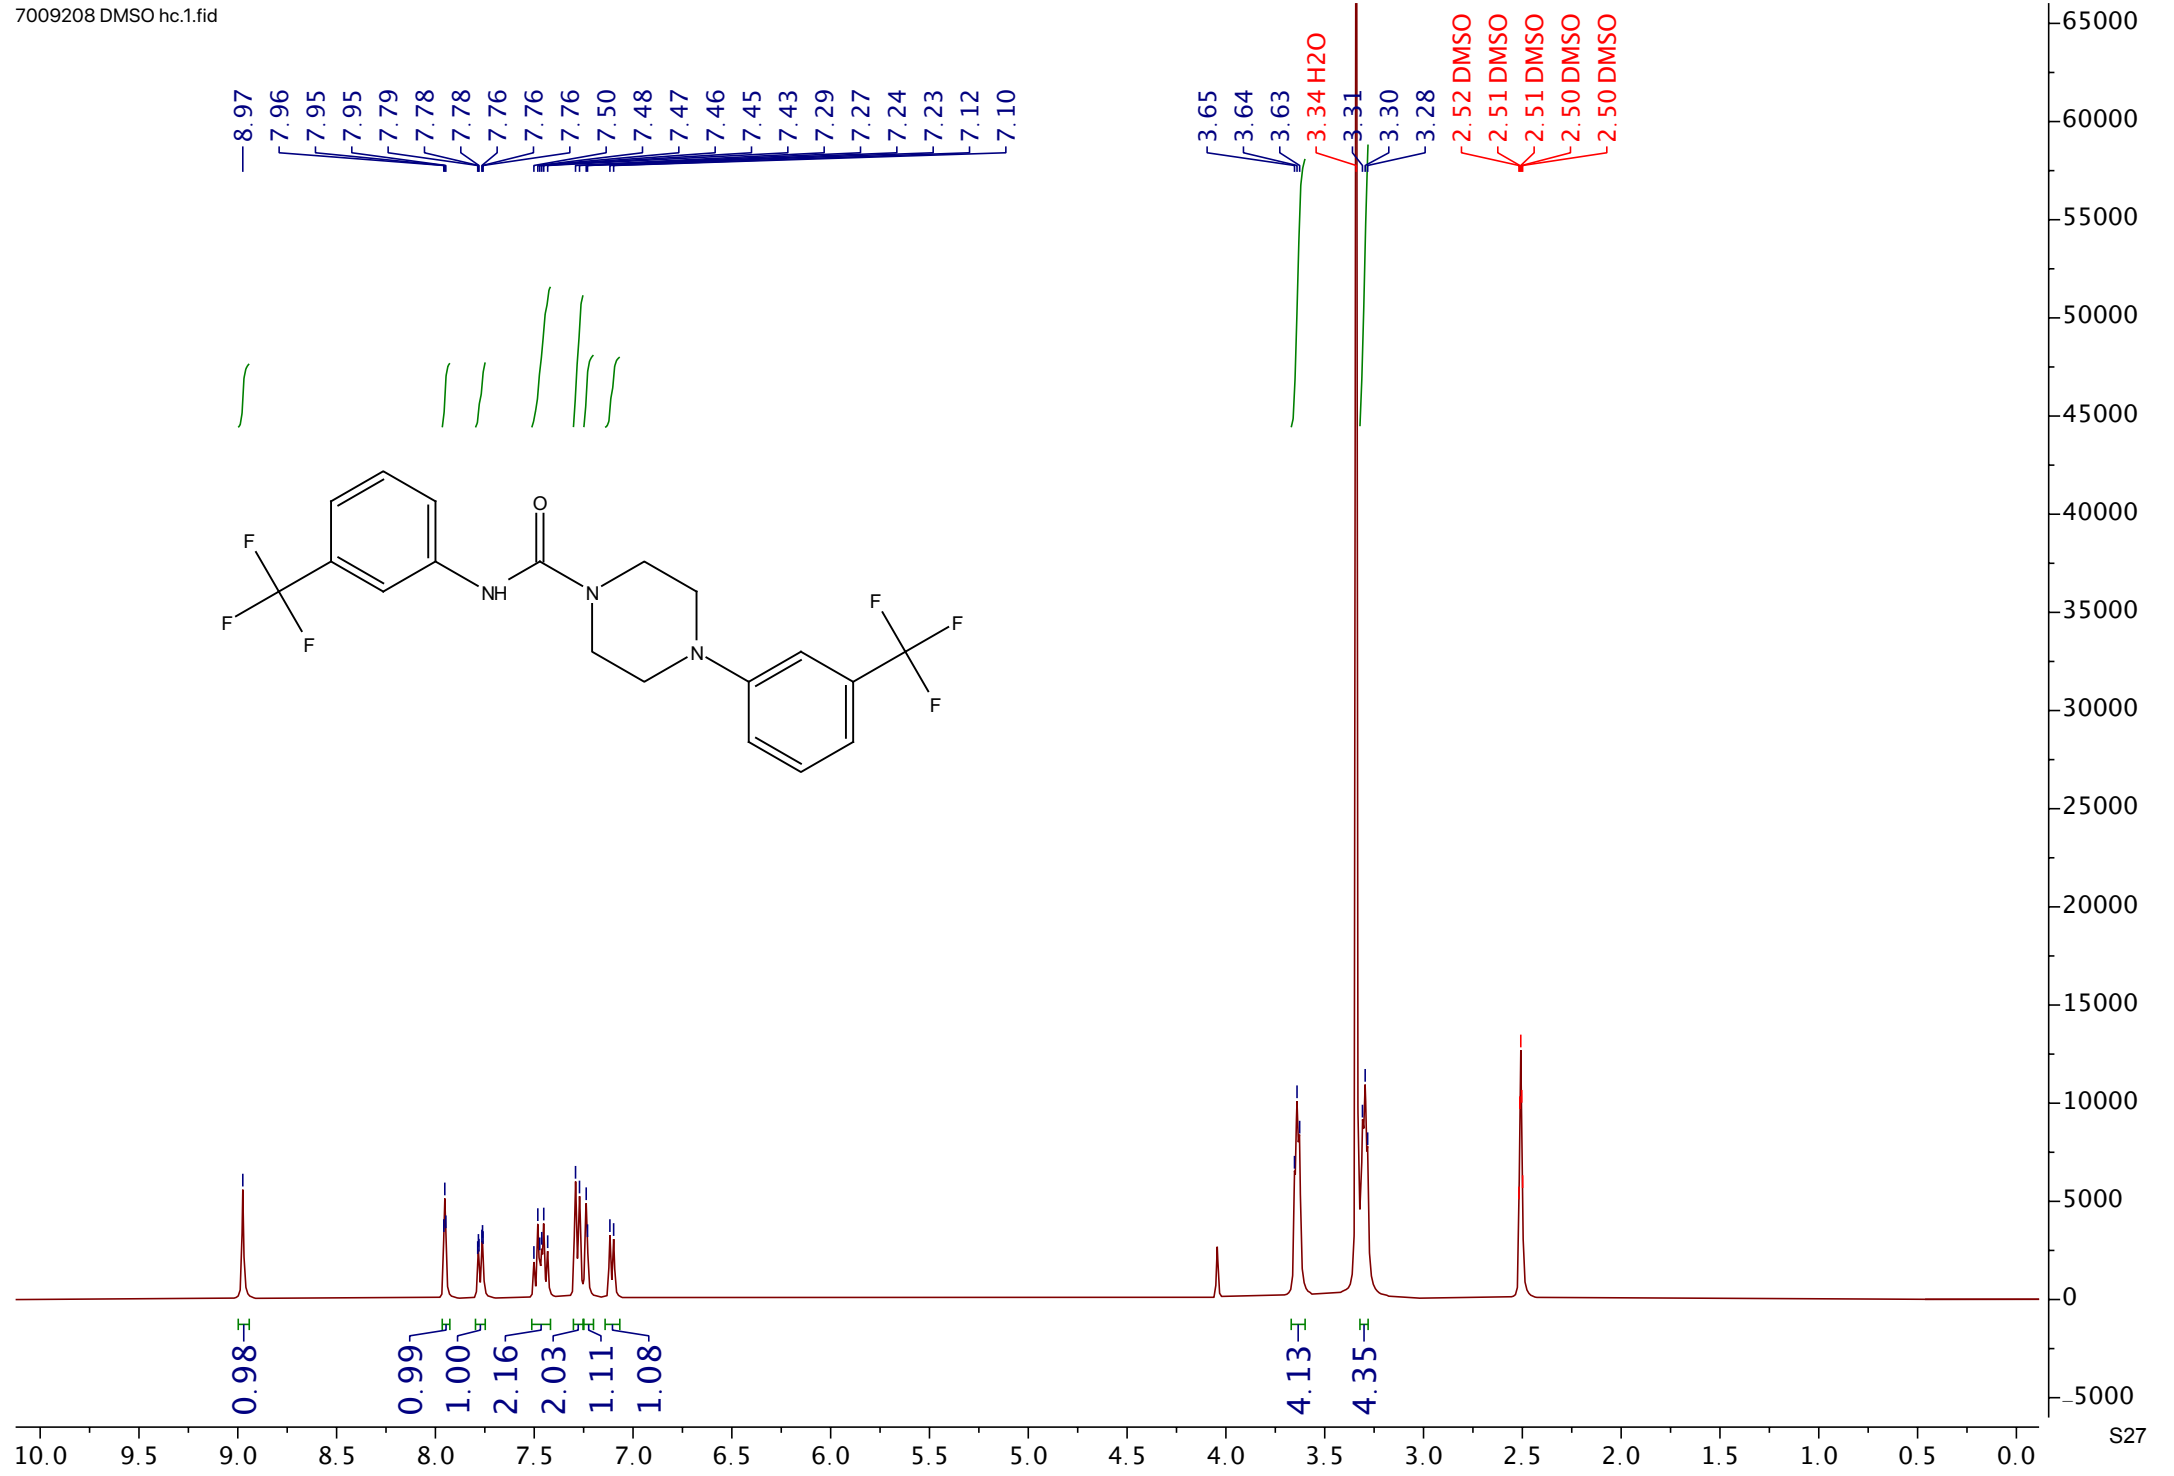

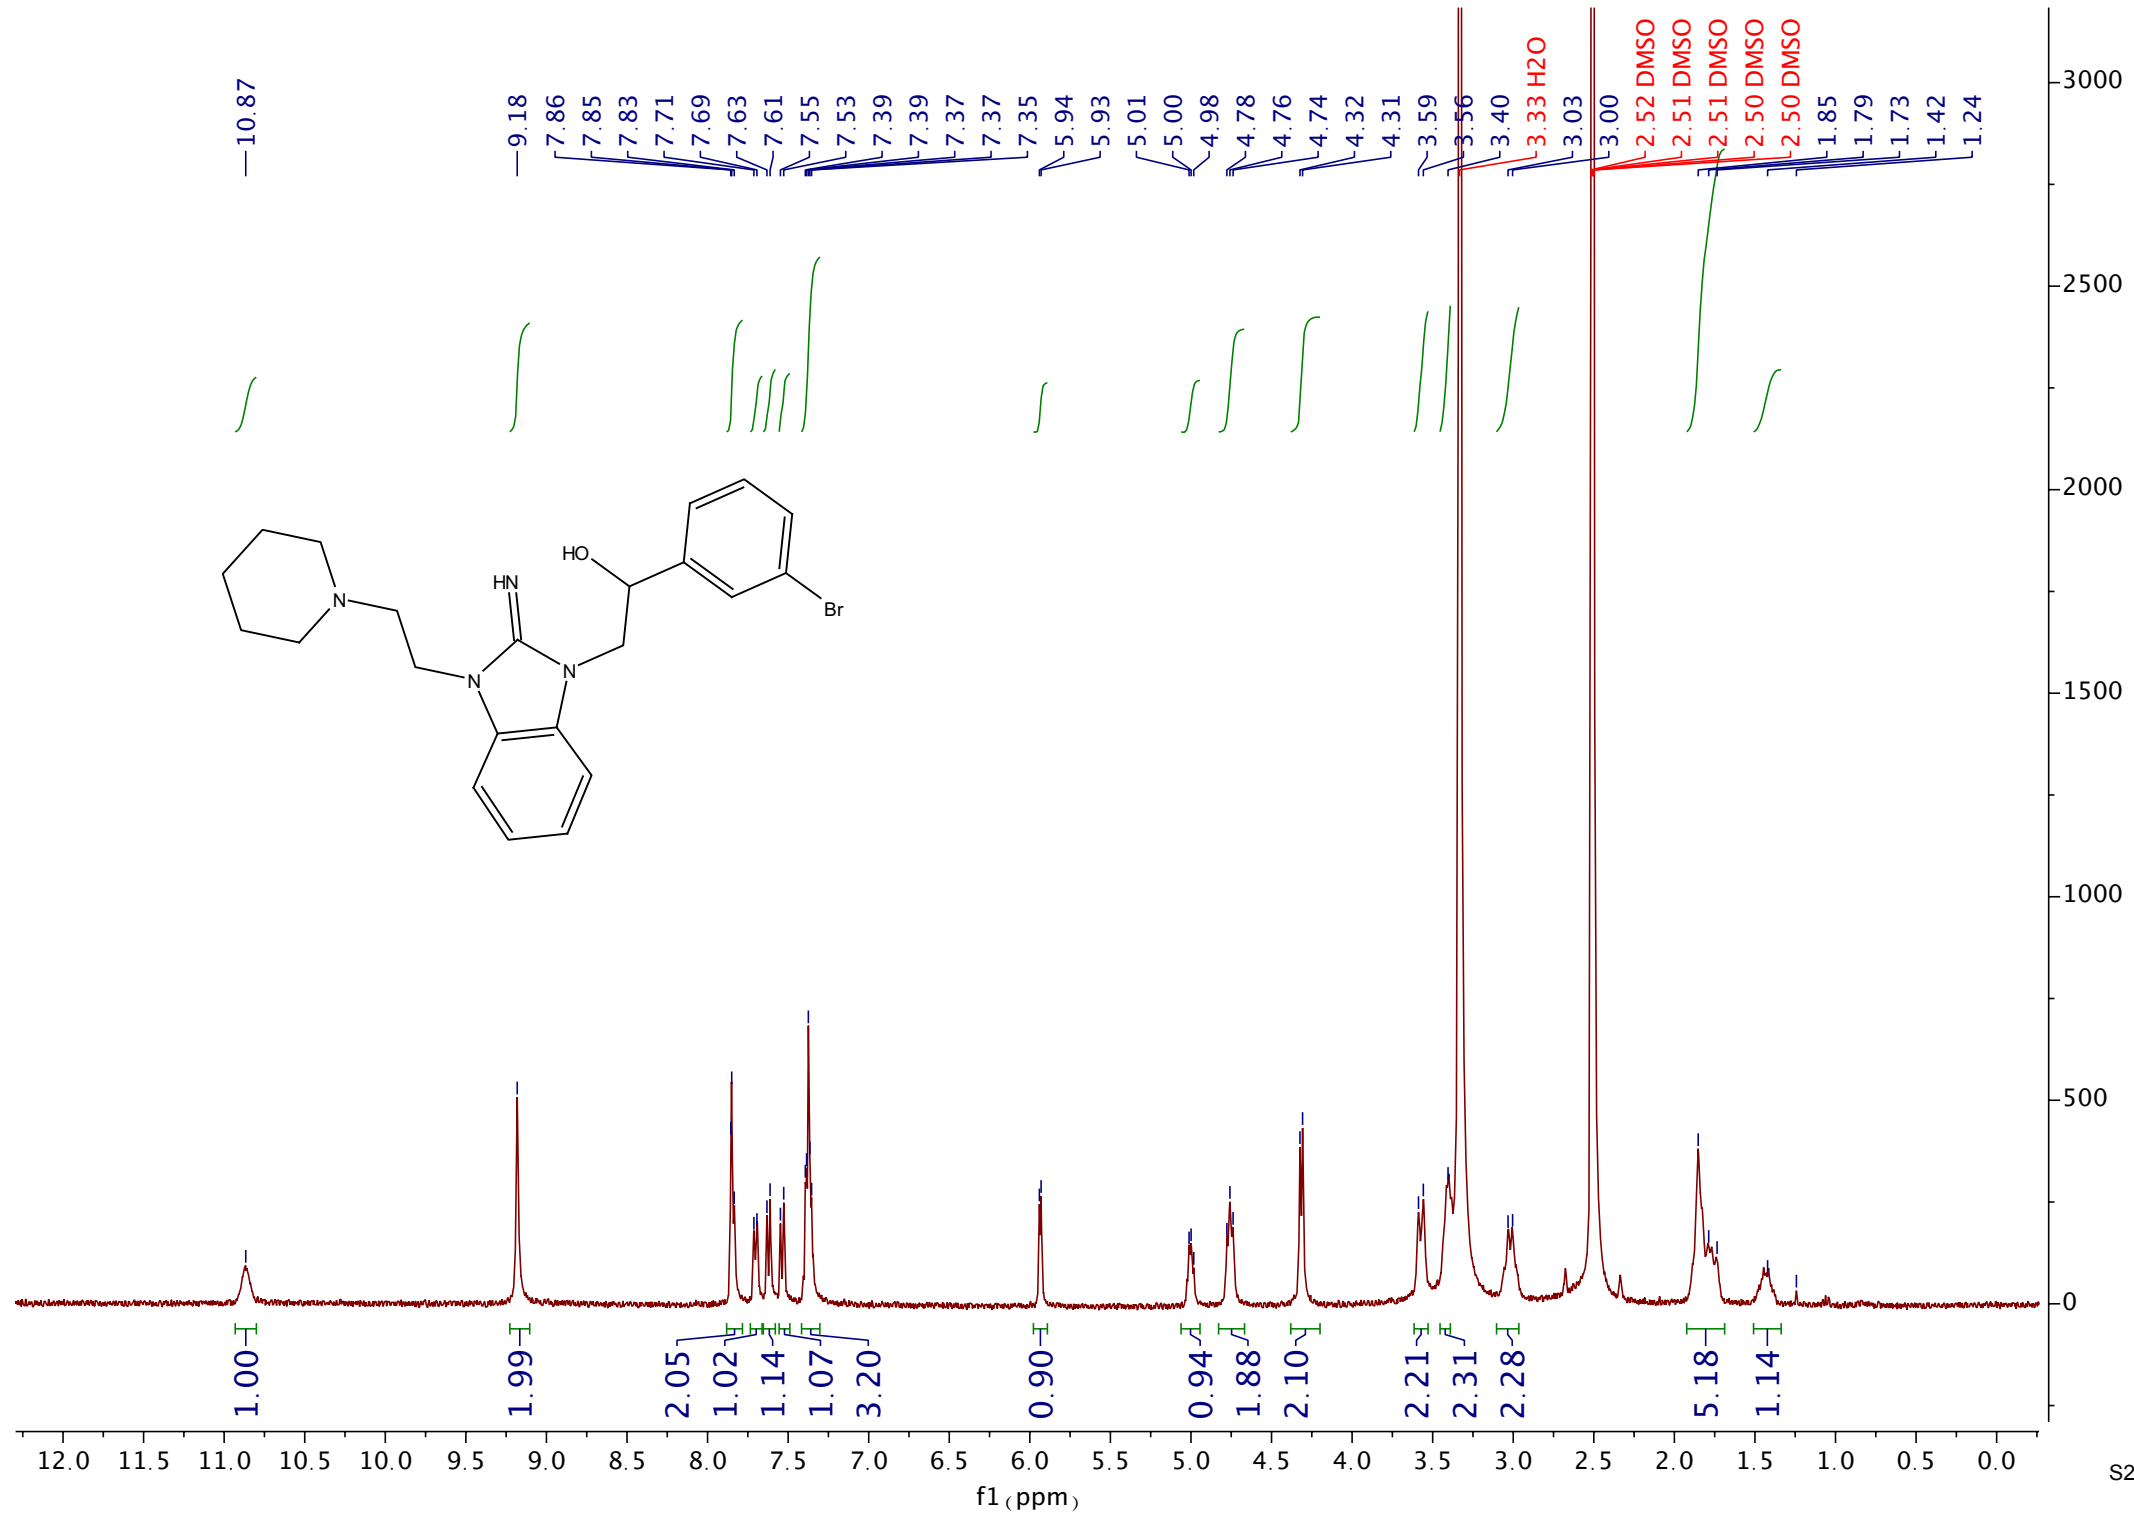

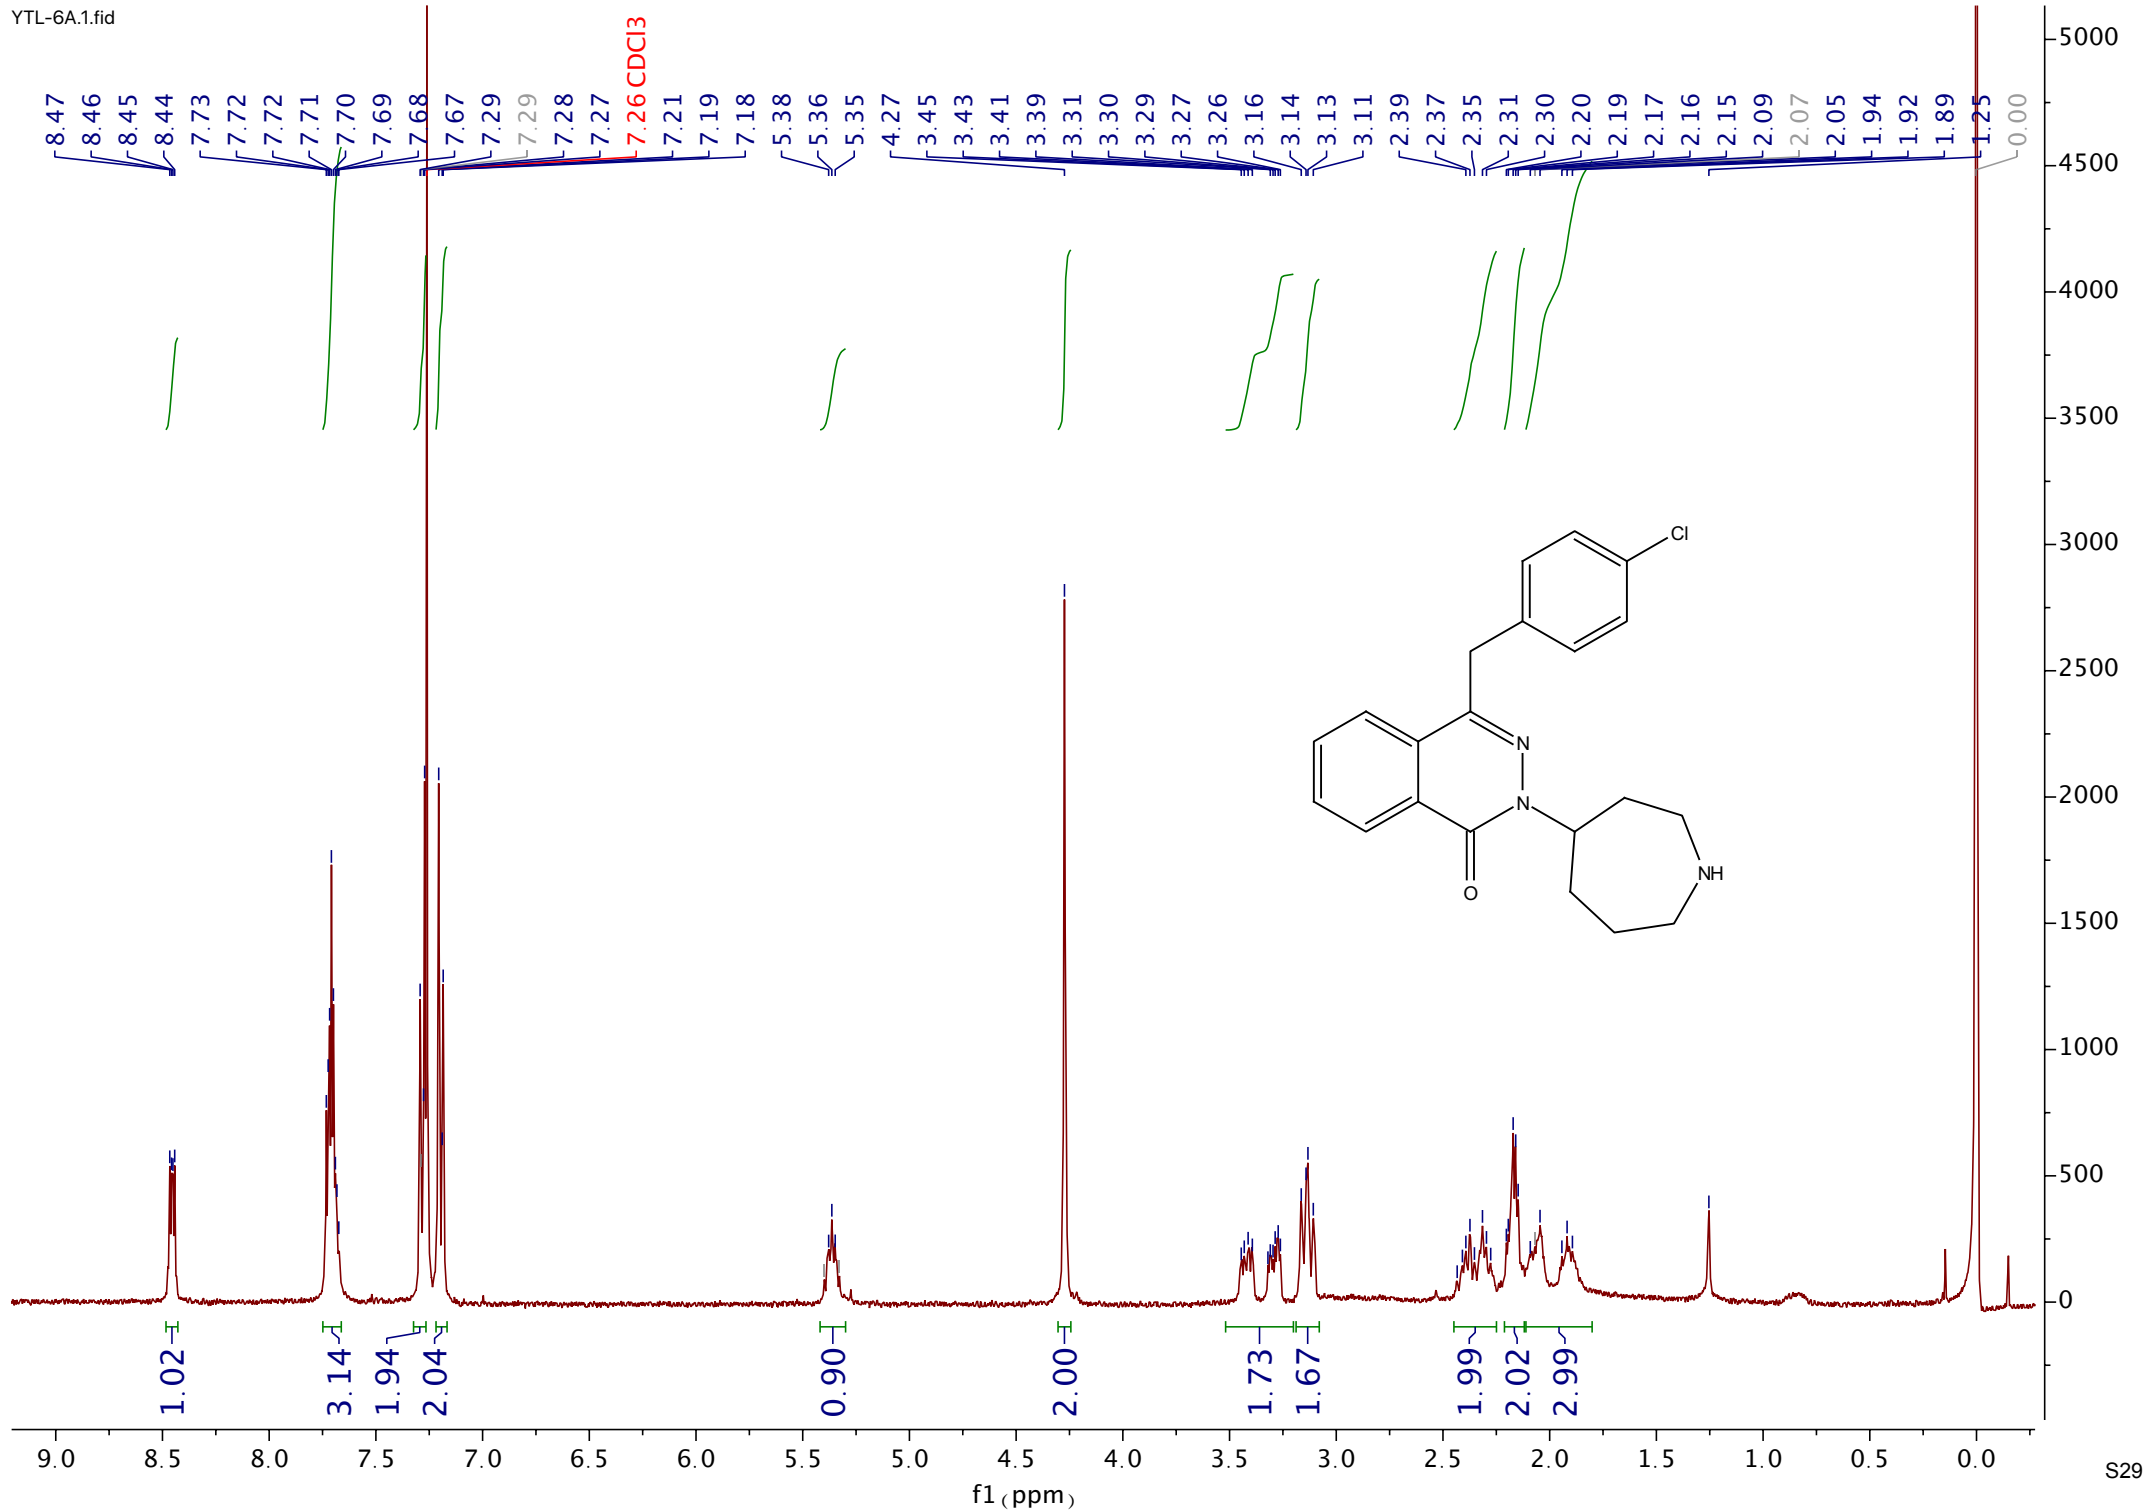

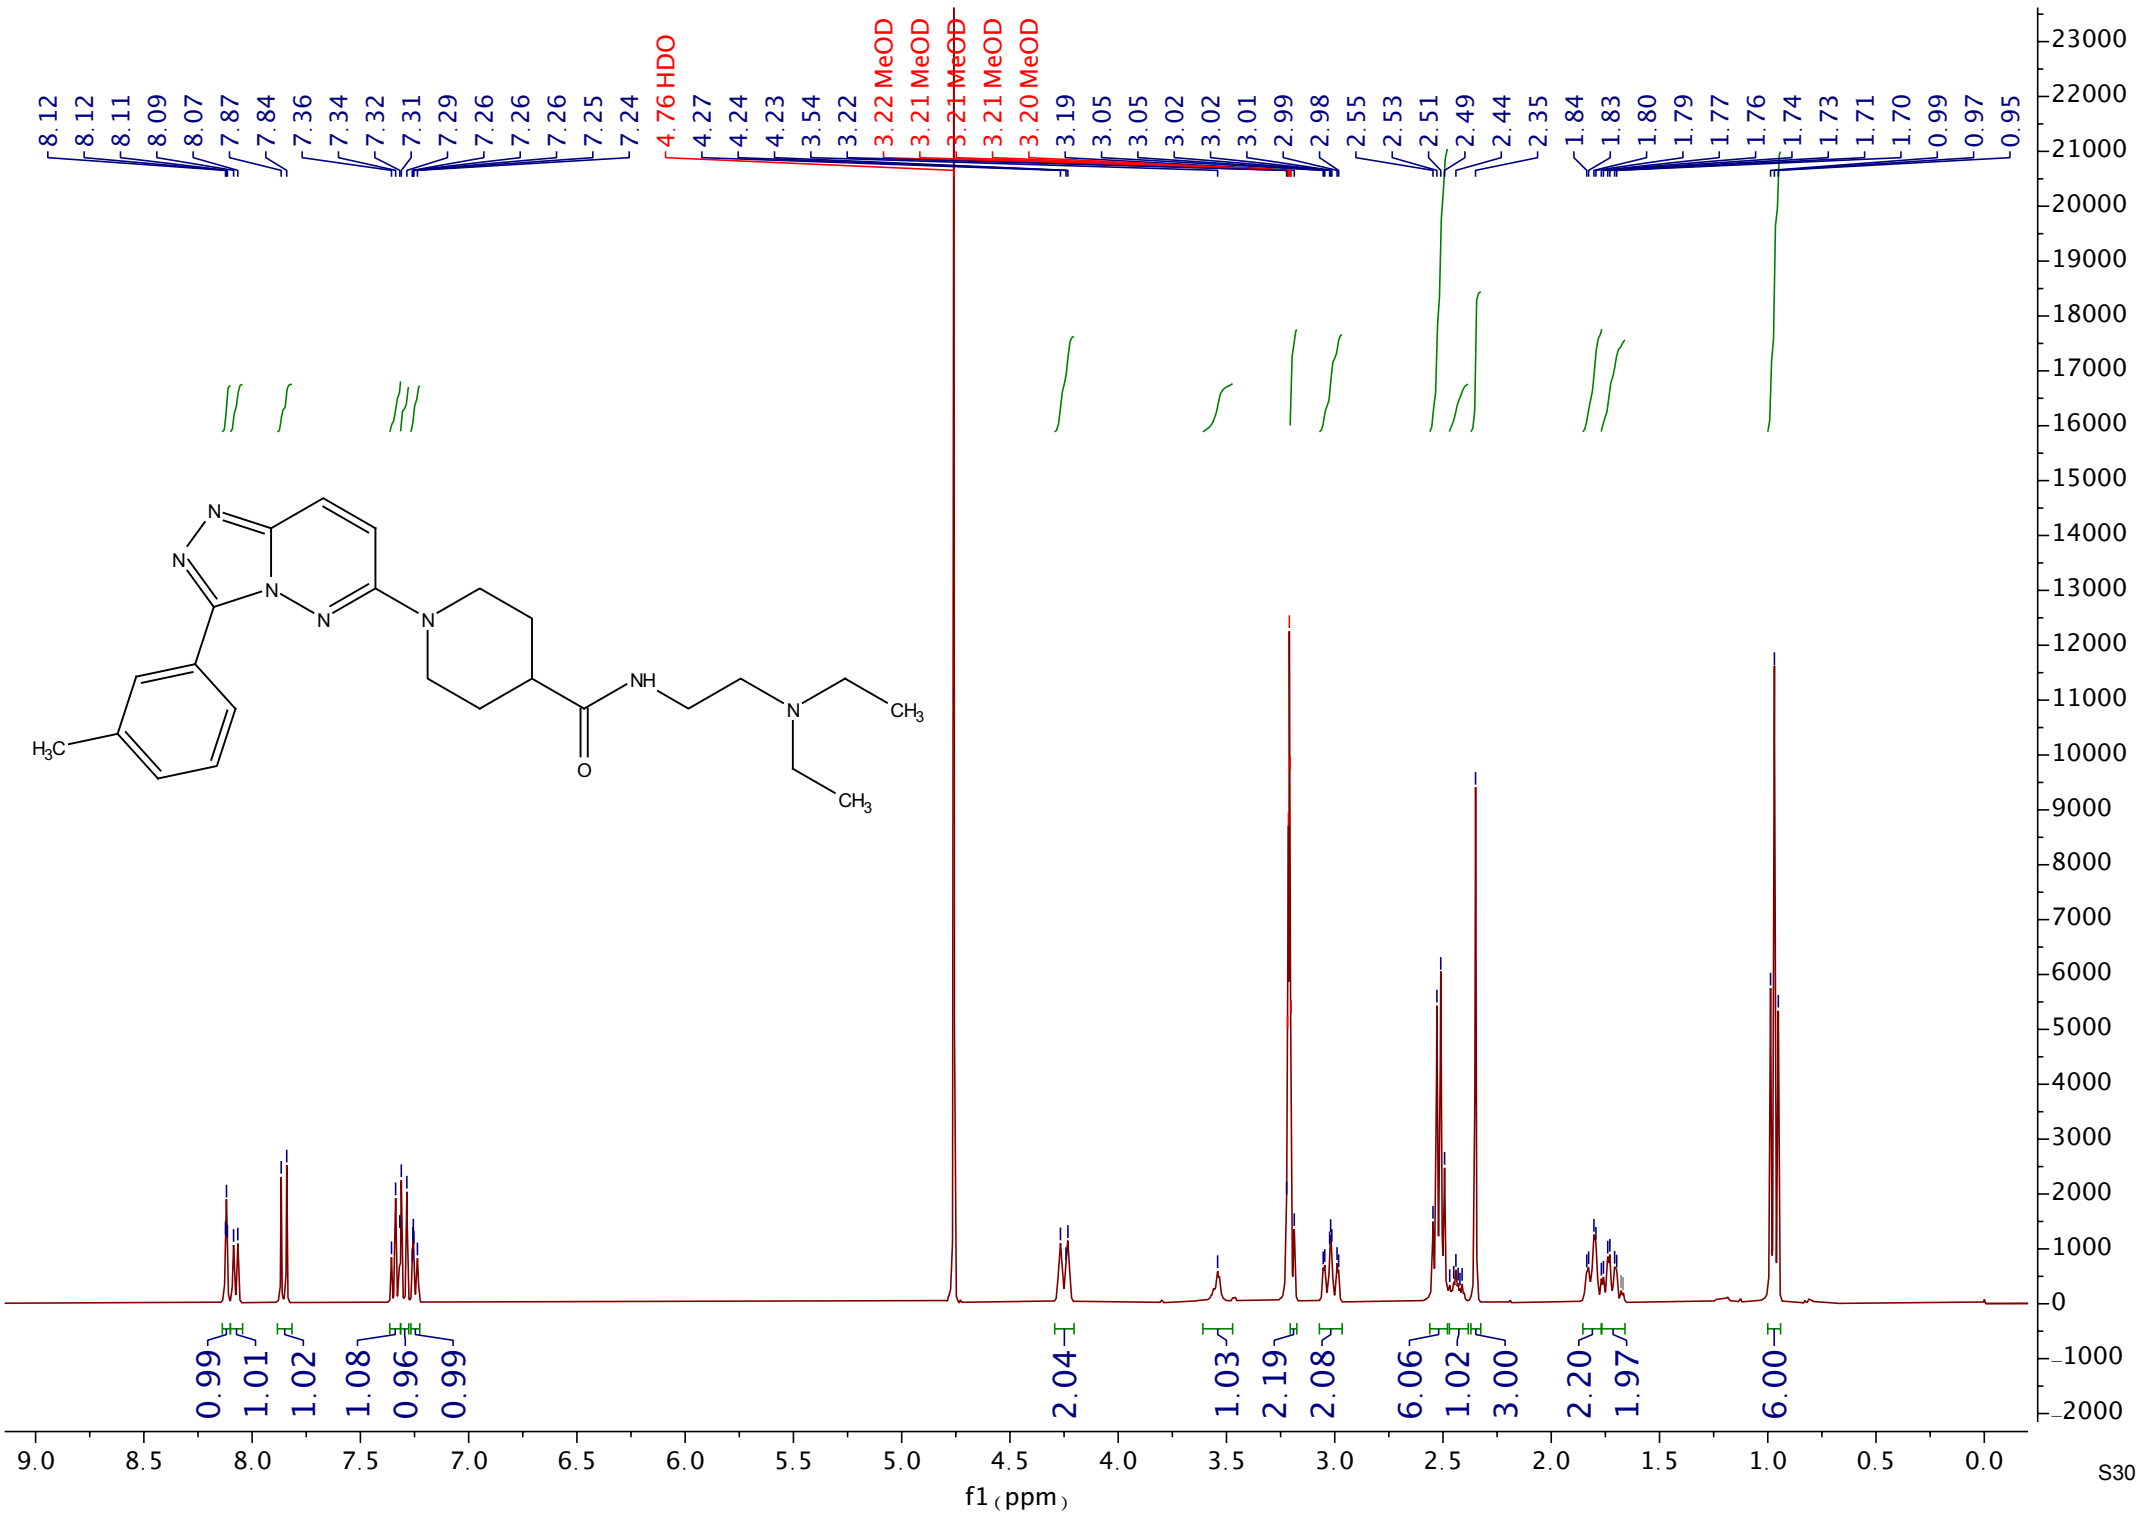

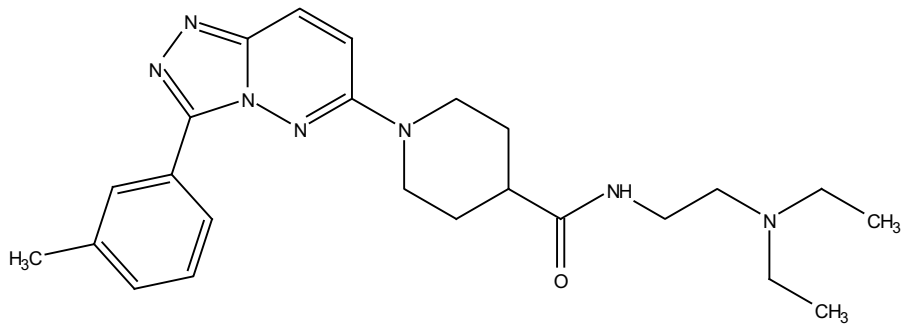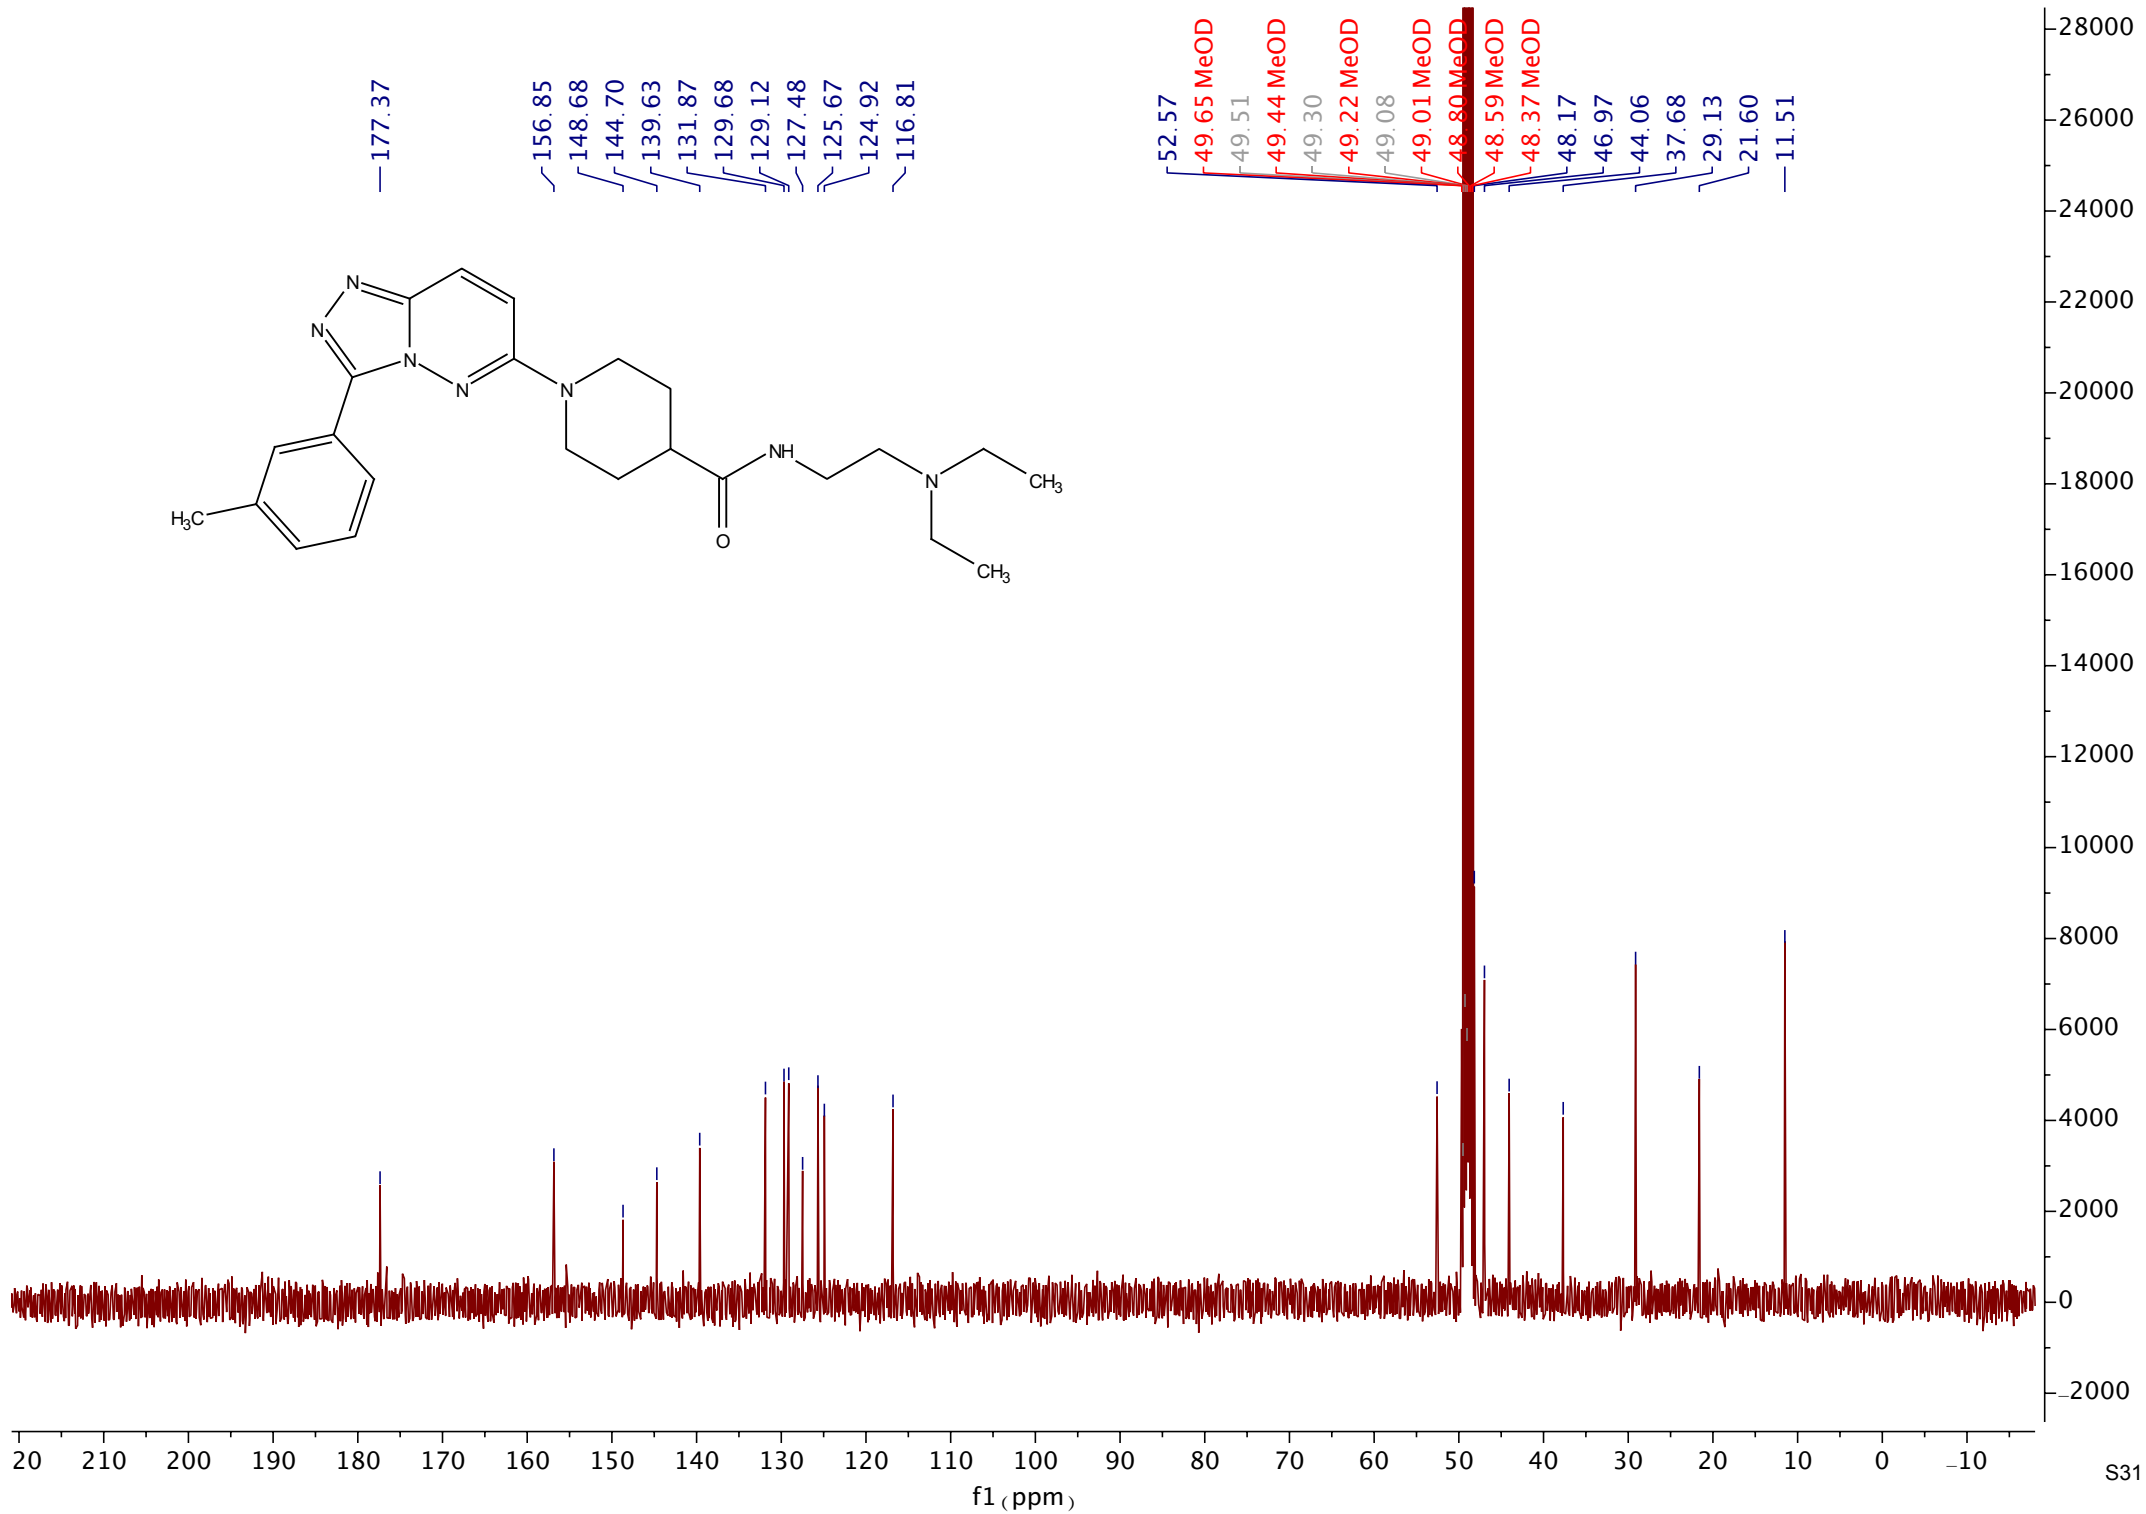

Supplement: NIHMS1812278-supplement-supinfo.pdf [file NIHMS1812278-supplement-supinfo.pdf]
